# Supplementary material for: An integrated bioinformatic analysis of bulk and single-cell sequencing clarifies immune microenvironment and metabolic profiles of lung adenocarcinoma to predict immunotherapy efficacy
Source: Front Cell Dev Biol. 2023 Apr 5;11:1163314. doi: 10.3389/fcell.2023.1163314 (PMC10113470; doi:10.3389/fcell.2023.1163314)
Supplement: Supplementary file 1 [file Table2.XLSX]

## Sheet: Erlotinib
	est.ic50	ImmClust
TCGA-97-7938-01A	2.72467	C2
TCGA-55-7574-01A	4.41804	C1
TCGA-05-4250-01A	4.58781	C2
TCGA-95-A4VK-01A	4.46707	C2
TCGA-97-A4M6-01A	1.1218	C2
TCGA-78-7155-01A	6.81906	C2
TCGA-05-4402-01A	4.82522	C2
TCGA-MP-A4T4-01A	3.97686	C2
TCGA-78-7535-01A	4.79468	C2
TCGA-55-8619-01A	4.30839	C2
TCGA-95-7567-01A	3.7968	C2
TCGA-49-6745-01A	3.68566	C1
TCGA-MP-A4TI-01A	3.47151	C1
TCGA-50-6673-01A	3.11186	C1
TCGA-55-1592-01A	4.74465	C2
TCGA-44-8117-01A	5.30762	C1
TCGA-50-6594-01A	3.78291	C1
TCGA-62-8402-01A	4.5354	C2
TCGA-50-5045-01A	2.14733	C2
TCGA-J2-A4AD-01A	5.36352	C1
TCGA-4B-A93V-01A	5.26165	C2
TCGA-67-3770-01A	3.84569	C2
TCGA-05-5715-01A	NA	C1
TCGA-50-8460-01A	5.48936	C2
TCGA-05-4249-01A	2.96627	C2
TCGA-86-A4P8-01A	5.25026	C2
TCGA-55-A494-01A	5.11192	C1
TCGA-95-8494-01A	5.09438	C2
TCGA-55-7726-01A	3.5294	C1
TCGA-78-8660-01A	4.48978	C2
TCGA-49-4490-01A	4.1672	C2
TCGA-05-4410-01A	4.12748	C2
TCGA-44-2659-01A	3.25098	C2
TCGA-78-7633-01A	5.46936	C2
TCGA-55-8299-01A	3.77518	C1
TCGA-67-6217-01A	4.78963	C2
TCGA-67-3774-01A	4.94058	C2
TCGA-MP-A4T6-01A	4.17782	C2
TCGA-50-5942-01A	1.9085	C2
TCGA-86-8280-01A	5.28469	C2
TCGA-44-7662-01A	4.60922	C1
TCGA-78-7146-01A	4.56938	C1
TCGA-97-8179-01A	4.51851	C2
TCGA-55-7570-01A	6.31526	C1
TCGA-50-5072-01A	4.67011	C1
TCGA-49-AAQV-01A	4.86818	C2
TCGA-86-8671-01A	2.75489	C2
TCGA-91-6829-01A	3.87843	C1
TCGA-78-7537-01A	5.49856	C1
TCGA-91-8497-01A	3.69735	C2
TCGA-69-7973-01A	5.39596	C1
TCGA-NJ-A55A-01A	3.38144	C2
TCGA-91-6849-01A	4.52685	C2
TCGA-49-AAR9-01A	5.19497	C1
TCGA-97-7552-01A	2.79109	C2
TCGA-55-8092-01A	2.85051	C2
TCGA-75-6214-01A	3.3087	C2
TCGA-49-6744-01A	2.85841	C2
TCGA-64-1680-01A	4.59608	C2
TCGA-95-7043-01A	-0.386287	C1
TCGA-55-8091-01A	4.91841	C1
TCGA-73-4676-01A	4.49402	C1
TCGA-55-6982-01A	3.70568	C1
TCGA-62-A46Y-01A	5.89899	C2
TCGA-44-2656-01A	2.91376	C2
TCGA-L4-A4E5-01A	5.33636	C1
TCGA-50-5051-01A	4.87288	C2
TCGA-49-AARQ-01A	5.23155	C2
TCGA-78-7161-01A	9.37515	C1
TCGA-05-4426-01A	5.79276	C2
TCGA-97-A4M0-01A	3.99352	C2
TCGA-44-8120-01A	5.48451	C1
TCGA-78-7147-01A	3.25747	C2
TCGA-86-7713-01A	7.17551	C1
TCGA-67-3773-01A	0.751842	C2
TCGA-44-A479-01A	4.26014	C1
TCGA-05-4422-01A	2.66579	C2
TCGA-49-4494-01A	5.02768	C2
TCGA-91-6830-01A	2.57919	C2
TCGA-44-7669-01A	6.64243	C2
TCGA-50-5066-01A	1.54463	C2
TCGA-64-5815-01A	4.14737	C1
TCGA-50-5939-01A	4.76975	C1
TCGA-MP-A4TA-01A	4.37192	C2
TCGA-64-5778-01A	3.79856	C2
TCGA-80-5611-01A	4.60832	C2
TCGA-44-2662-01A	5.91024	C1
TCGA-05-5429-01A	3.83445	C2
TCGA-38-4632-01A	3.79396	C2
TCGA-O1-A52J-01A	6.06997	C2
TCGA-75-6206-01A	4.47054	C2
TCGA-64-5774-01A	7.59451	C1
TCGA-05-4418-01A	4.20002	C2
TCGA-64-1677-01A	3.40179	C2
TCGA-55-8507-01A	5.69289	C1
TCGA-05-5425-01A	1.87429	C2
TCGA-49-4510-01A	6.92583	C2
TCGA-78-8655-01A	4.07686	C1
TCGA-55-6979-01A	4.16178	C2
TCGA-NJ-A7XG-01A	5.00815	C2
TCGA-91-8499-01A	6.54019	C2
TCGA-50-7109-01A	5.84392	C1
TCGA-97-8547-01A	3.75494	C1
TCGA-49-4514-01A	3.32306	C2
TCGA-78-7153-01A	4.26249	C2
TCGA-55-6971-01A	6.13571	C2
TCGA-49-AARE-01A	4.67313	C1
TCGA-69-8254-01A	1.68411	C2
TCGA-49-6761-01A	5.05467	C1
TCGA-69-7980-01A	3.92647	C2
TCGA-69-8253-01A	5.87961	C2
TCGA-95-7947-01A	3.35275	C2
TCGA-95-8039-01A	3.35845	C2
TCGA-62-8394-01A	4.75353	C2
TCGA-55-8616-01A	2.96324	C1
TCGA-55-6986-01A	5.02587	C2
TCGA-49-6743-01A	4.4879	C1
TCGA-49-AAR4-01A	3.88427	C1
TCGA-35-3615-01A	2.67524	C2
TCGA-99-AA5R-01A	4.91096	C2
TCGA-05-4417-01A	5.27331	C1
TCGA-53-7624-01A	2.79167	C2
TCGA-97-A4M2-01A	4.51558	C2
TCGA-97-A4M3-01A	7.29816	C1
TCGA-44-2668-01A	4.2395	C1
TCGA-49-AAR0-01A	5.31572	C2
TCGA-78-7158-01A	1.36429	C2
TCGA-49-4512-01A	4.30905	C1
TCGA-86-7711-01A	4.92967	C1
TCGA-75-5147-01A	2.4533	C2
TCGA-L9-A50W-01A	2.62171	C2
TCGA-75-5125-01A	5.10168	C2
TCGA-80-5607-01A	4.23139	C2
TCGA-55-8094-01A	5.97407	C2
TCGA-05-4430-01A	2.34776	C1
TCGA-91-A4BD-01A	2.03444	C2
TCGA-78-7149-01A	5.95153	C2
TCGA-50-6593-01A	3.81065	C1
TCGA-86-8054-01A	6.07301	C1
TCGA-55-A48Z-01A	4.96116	C1
TCGA-05-5420-01A	1.40324	C2
TCGA-55-8090-01A	5.06256	C1
TCGA-44-8119-01A	6.30648	C1
TCGA-55-7994-01A	5.71245	C2
TCGA-69-7763-01A	4.66012	C1
TCGA-73-7499-01A	1.84841	C2
TCGA-55-8301-01A	2.6887	C2
TCGA-NJ-A4YI-01A	3.4662	C1
TCGA-55-7573-01A	3.99781	C2
TCGA-75-7030-01A	2.60392	C1
TCGA-91-A4BC-01A	3.676	C1
TCGA-78-7220-01A	4.1571	C2
TCGA-05-4382-01A	3.92032	C1
TCGA-75-7031-01A	4.66501	C2
TCGA-86-8278-01A	4.36324	C1
TCGA-NJ-A55R-01A	5.29223	C1
TCGA-97-8175-01A	6.26591	C2
TCGA-73-4662-01A	3.74439	C2
TCGA-44-6774-01A	3.46772	C1
TCGA-MP-A4TJ-01A	4.1166	C1
TCGA-69-7765-01A	3.23007	C1
TCGA-64-5775-01A	5.52785	C1
TCGA-44-7661-01A	4.75559	C1
TCGA-49-4486-01A	3.40744	C2
TCGA-75-6211-01A	4.64015	C1
TCGA-49-AARN-01A	3.6091	C2
TCGA-38-7271-01A	2.82447	C2
TCGA-62-8399-01A	5.81875	C1
TCGA-73-4666-01A	4.08557	C2
TCGA-86-7953-01A	3.72595	C1
TCGA-75-5126-01A	4.18874	C2
TCGA-86-8055-01A	4.21572	C1
TCGA-55-5899-01A	5.70205	C1
TCGA-86-8359-01A	6.83112	C1
TCGA-05-4420-01A	6.25172	C2
TCGA-38-4625-01A	3.8645	C1
TCGA-55-8505-01A	4.99856	C1
TCGA-99-8028-01A	2.13251	C2
TCGA-38-6178-01A	3.8809	C1
TCGA-55-6987-01A	3.52874	C2
TCGA-83-5908-01A	3.24124	C2
TCGA-55-6543-01A	4.9734	C2
TCGA-64-1678-01A	3.94338	C2
TCGA-91-6835-01A	4.10583	C2
TCGA-S2-AA1A-01A	3.89886	C2
TCGA-69-7761-01A	1.18837	C2
TCGA-86-8672-01A	4.29708	C2
TCGA-44-5644-01A	6.22009	C1
TCGA-MP-A4SW-01A	3.67174	C2
TCGA-MP-A4SV-01A	4.73018	C2
TCGA-44-6779-01A	0.821739	C2
TCGA-97-A4LX-01A	4.42763	C2
TCGA-99-8025-01A	4.78251	C1
TCGA-55-A57B-01A	3.8112	C1
TCGA-MN-A4N1-01A	5.53698	C1
TCGA-38-4628-01A	2.37687	C2
TCGA-35-4123-01A	4.35097	C2
TCGA-50-5930-01A	1.43488	C1
TCGA-73-4677-01A	4.67661	C2
TCGA-69-7764-01A	4.7518	C2
TCGA-49-4501-01A	3.53477	C2
TCGA-44-3918-01A	4.0082	C2
TCGA-44-2655-01A	3.20132	C2
TCGA-05-4434-01A	2.88528	C2
TCGA-44-6145-01A	2.8946	C2
TCGA-78-7150-01A	4.49998	C1
TCGA-38-4626-01A	4.72706	C2
TCGA-91-6840-01A	2.67117	C2
TCGA-J2-A4AE-01A	3.91974	C2
TCGA-50-5932-01A	5.35355	C2
TCGA-62-A46R-01A	4.16292	C2
TCGA-05-4405-01A	3.42577	C1
TCGA-75-6212-01A	4.74388	C2
TCGA-97-7554-01A	4.77223	C1
TCGA-73-4675-01A	4.95799	C1
TCGA-MN-A4N5-01A	4.62469	C2
TCGA-91-6828-01A	4.89664	C2
TCGA-93-8067-01A	4.85066	C1
TCGA-97-8176-01A	4.40216	C1
TCGA-55-A493-01A	6.04643	C1
TCGA-62-A46S-01A	5.92937	C2
TCGA-55-6968-01A	5.82044	C2
TCGA-44-6147-01A	1.4194	C2
TCGA-55-7911-01A	4.47394	C2
TCGA-73-4658-01A	2.8669	C1
TCGA-44-6778-01A	4.64129	C2
TCGA-75-6205-01A	2.66511	C1
TCGA-75-6203-01A	4.87871	C2
TCGA-L9-A444-01A	4.078	C2
TCGA-64-5779-01A	5.49521	C1
TCGA-44-7660-01A	4.23681	C1
TCGA-44-2666-01A	3.35141	C2
TCGA-78-8640-01A	5.87532	C2
TCGA-44-6777-01A	3.54102	C1
TCGA-J2-8194-01A	5.51291	C1
TCGA-55-7903-01A	4.13872	C2
TCGA-97-8174-01A	8.27264	C1
TCGA-99-8033-01A	4.55655	C2
TCGA-55-1594-01A	4.57935	C2
TCGA-55-6980-01A	3.96204	C2
TCGA-MP-A4TK-01A	4.19309	C1
TCGA-55-8207-01A	3.4901	C1
TCGA-44-A4SS-01A	2.86591	C1
TCGA-50-5933-01A	4.7088	C1
TCGA-44-7672-01A	3.13685	C1
TCGA-67-3771-01A	3.48877	C2
TCGA-67-3772-01A	2.22098	C2
TCGA-97-A4M5-01A	3.47639	C2
TCGA-53-A4EZ-01A	3.72492	C2
TCGA-99-8032-01A	5.03331	C1
TCGA-73-4670-01A	4.77189	C1
TCGA-55-7576-01A	4.1823	C1
TCGA-05-4425-01A	3.16535	C2
TCGA-93-A4JN-01A	3.92193	C1
TCGA-55-6983-01A	4.03465	C1
TCGA-75-7027-01A	4.70106	C1
TCGA-62-A472-01A	4.57278	C2
TCGA-78-7154-01A	4.46949	C1
TCGA-50-5044-01A	4.73299	C2
TCGA-95-A4VP-01A	4.89475	C2
TCGA-86-8674-01A	5.04617	C1
TCGA-97-A4M1-01A	4.91092	C2
TCGA-49-AARO-01A	4.15689	C1
TCGA-91-6831-01A	5.91967	C1
TCGA-55-6642-01A	4.76278	C1
TCGA-86-8056-01A	3.05926	C2
TCGA-L9-A5IP-01A	3.13318	C1
TCGA-97-7546-01A	4.83954	C2
TCGA-97-7547-01A	NA	C2
TCGA-NJ-A55O-01A	5.60134	C2
TCGA-55-7914-01A	3.68988	C2
TCGA-78-7143-01A	4.00645	C2
TCGA-55-8205-01A	4.64132	C2
TCGA-05-4415-01A	5.73596	C2
TCGA-86-8358-01A	7.18152	C1
TCGA-91-6847-01A	5.80069	C2
TCGA-86-8585-01A	5.20429	C2
TCGA-55-8203-01A	6.20027	C1
TCGA-71-6725-01A	4.58824	C2
TCGA-55-7816-01A	3.61393	C1
TCGA-55-6978-01A	4.1603	C1
TCGA-44-6775-01A	1.70847	C1
TCGA-49-4506-01A	NA	C2
TCGA-86-7954-01A	0.262994	C2
TCGA-78-8662-01A	3.31059	C1
TCGA-MP-A4TF-01A	6.27318	C2
TCGA-MP-A4T7-01A	4.49368	C2
TCGA-44-5645-01A	1.0797	C2
TCGA-55-8506-01A	4.30024	C1
TCGA-50-6591-01A	6.53619	C1
TCGA-L4-A4E6-01A	2.98955	C2
TCGA-49-4505-01A	3.26863	C2
TCGA-44-4112-01A	4.30476	C2
TCGA-67-6216-01A	4.30228	C2
TCGA-55-8508-01A	5.6163	C1
TCGA-55-8085-01A	4.24485	C2
TCGA-62-A471-01A	3.91115	C2
TCGA-44-A4SU-01A	5.10329	C1
TCGA-73-7498-01A	5.7099	C2
TCGA-55-8206-01A	5.11237	C2
TCGA-75-6207-01A	4.42212	C1
TCGA-95-7948-01A	2.311	C2
TCGA-50-5944-01A	3.6187	C2
TCGA-50-8459-01A	2.37814	C1
TCGA-49-6742-01A	3.19876	C2
TCGA-64-1679-01A	4.66846	C1
TCGA-L9-A443-01A	2.49837	C1
TCGA-97-A4M7-01A	2.66189	C2
TCGA-MP-A4TH-01A	7.57533	C2
TCGA-75-5122-01A	1.90833	C2
TCGA-55-8087-01A	3.13452	C2
TCGA-62-A46P-01A	7.49644	C2
TCGA-50-6595-01A	3.68903	C1
TCGA-44-6146-01A	3.45728	C2
TCGA-49-AAR3-01A	3.60343	C2
TCGA-55-6985-01A	4.25682	C1
TCGA-38-4627-01A	2.89279	C1
TCGA-55-6975-01A	4.58559	C1
TCGA-62-A46V-01A	3.69594	C1
TCGA-55-6984-01A	4.67458	C2
TCGA-53-7813-01A	4.33776	C2
TCGA-38-4631-01A	3.74647	C2
TCGA-49-4507-01A	2.35544	C2
TCGA-78-7159-01A	6.99036	C1
TCGA-55-8510-01A	4.02781	C1
TCGA-86-7955-01A	6.98594	C2
TCGA-55-A4DG-01A	3.75768	C2
TCGA-44-6148-01A	4.35725	C2
TCGA-93-A4JP-01A	4.59091	C2
TCGA-50-5931-01A	3.21326	C1
TCGA-97-8177-01A	3.02515	C2
TCGA-50-5946-01A	5.04198	C1
TCGA-50-5055-01A	1.18444	C2
TCGA-78-8648-01A	3.20827	C1
TCGA-71-8520-01A	3.47189	C1
TCGA-50-5935-01A	1.50664	C2
TCGA-78-7167-01A	5.08795	C1
TCGA-69-7978-01A	5.05679	C2
TCGA-44-7670-01A	4.14722	C1
TCGA-69-7974-01A	4.18851	C1
TCGA-44-3398-01A	3.12335	C2
TCGA-NJ-A4YG-01A	2.11427	C2
TCGA-05-5428-01A	3.16336	C2
TCGA-93-A4JQ-01A	3.85672	C1
TCGA-69-7760-01A	5.31552	C1
TCGA-55-A4DF-01A	5.08064	C2
TCGA-62-8397-01A	4.20782	C2
TCGA-78-7163-01A	6.49477	C2
TCGA-86-A456-01A	3.83939	C2
TCGA-91-7771-01A	3.89184	C2
TCGA-50-8457-01A	2.53159	C2
TCGA-80-5608-01A	7.67746	C2
TCGA-86-6851-01A	4.44775	C2
TCGA-05-4384-01A	5.03802	C2
TCGA-64-1681-01A	3.88114	C2
TCGA-44-7671-01A	5.55117	C1
TCGA-55-8511-01A	5.4641	C1
TCGA-MP-A4TC-01A	3.98684	C1
TCGA-75-7025-01A	3.43893	C2
TCGA-55-8302-01A	4.87458	C2
TCGA-NJ-A4YF-01A	6.38495	C1
TCGA-55-6970-01A	3.79366	C2
TCGA-55-8620-01A	5.62033	C2
TCGA-50-5941-01A	4.43871	C2
TCGA-78-7539-01A	1.62715	C2
TCGA-L9-A743-01A	4.10367	C2
TCGA-73-A9RS-01A	4.9915	C2
TCGA-44-2665-01A	4.11094	C1
TCGA-L9-A8F4-01A	5.23547	C2
TCGA-55-7725-01A	NA	C2
TCGA-MP-A4TE-01A	5.49815	C1
TCGA-86-8673-01A	5.17115	C1
TCGA-86-8074-01A	4.11554	C1
TCGA-86-A4D0-01A	3.71713	C1
TCGA-MP-A4T8-01A	5.38193	C1
TCGA-44-5643-01A	1.51093	C2
TCGA-97-8552-01A	6.6949	C2
TCGA-69-A59K-01A	6.13707	C1
TCGA-86-7701-01A	4.96909	C1
TCGA-62-A470-01A	5.0341	C2
TCGA-55-7727-01A	3.70824	C2
TCGA-62-8398-01A	4.78226	C1
TCGA-78-7145-01A	5.36067	C1
TCGA-67-6215-01A	4.11986	C2
TCGA-55-7907-01A	3.99689	C1
TCGA-MP-A4T9-01A	4.47125	C1
TCGA-86-8669-01A	5.47671	C2
TCGA-49-AARR-01A	3.59002	C2
TCGA-97-7941-01A	3.18971	C2
TCGA-44-A47B-01A	5.08479	C2
TCGA-55-7227-01A	3.2053	C2
TCGA-55-8097-01A	3.23883	C2
TCGA-97-8171-01A	4.24046	C2
TCGA-99-7458-01A	2.96455	C2
TCGA-55-8089-01A	2.87957	C2
TCGA-05-4424-01A	3.48154	C2
TCGA-62-8395-01A	6.86376	C1
TCGA-55-A490-01A	5.62466	C1
TCGA-64-1676-01A	3.93743	C2
TCGA-50-5936-01A	4.86352	C1
TCGA-55-A48Y-01A	4.31473	C1
TCGA-93-7348-01A	0.440083	C1
TCGA-38-4630-01A	5.11413	C1
TCGA-05-5423-01A	3.13602	C2
TCGA-55-8621-01A	4.96602	C2
TCGA-05-4397-01A	3.46038	C2
TCGA-55-7910-01A	5.66329	C1
TCGA-J2-A4AG-01A	4.44438	C2
TCGA-86-8073-01A	4.06279	C1
TCGA-75-5146-01A	5.0867	C2
TCGA-NJ-A4YQ-01A	5.25475	C2
TCGA-55-7995-01A	3.40137	C2
TCGA-44-7659-01A	2.2501	C2
TCGA-55-1596-01A	4.0063	C2
TCGA-69-7979-01A	5.99392	C1
TCGA-55-7724-01A	2.92872	C2
TCGA-55-6972-01A	5.50559	C2
TCGA-44-3919-01A	4.1296	C2
TCGA-J2-8192-01A	4.01907	C1
TCGA-44-A47A-01A	0.956084	C2
TCGA-38-4629-01A	5.30633	C2
TCGA-86-A4JF-01A	4.33699	C2
TCGA-69-8453-01A	3.88251	C2
TCGA-91-8496-01A	6.17546	C2
TCGA-95-7039-01A	4.53748	C1
TCGA-NJ-A4YP-01A	3.45015	C1
TCGA-62-A46O-01A	4.32685	C2
TCGA-73-4668-01A	5.27035	C1
TCGA-05-4433-01A	4.06502	C2
TCGA-95-A4VN-01A	4.57798	C2
TCGA-78-7156-01A	3.16356	C2
TCGA-38-A44F-01A	2.57304	C2
TCGA-05-4396-01A	5.37209	C2
TCGA-55-8204-01A	2.2991	C1
TCGA-55-7815-01A	2.31014	C1
TCGA-55-7281-01A	3.98819	C1
TCGA-78-7166-01A	4.98011	C2
TCGA-55-8614-01A	3.76659	C1
TCGA-78-7152-01A	2.77963	C2
TCGA-64-5781-01A	0.97739	C2
TCGA-86-8075-01A	4.3957	C1
TCGA-MP-A4TD-01A	4.04202	C1
TCGA-86-8281-01A	3.83137	C1
TCGA-55-8513-01A	3.73065	C2
TCGA-78-7542-01A	6.43049	C2
TCGA-49-4487-01A	3.93441	C1
TCGA-05-4390-01A	6.89963	C1
TCGA-86-8668-01A	5.0383	C2
TCGA-73-4659-01A	6.34005	C1
TCGA-35-5375-01A	0.0957099	C2
TCGA-86-6562-01A	3.91357	C1
TCGA-86-8279-01A	4.39509	C1
TCGA-49-6767-01A	5.47676	C2
TCGA-44-6776-01A	4.85588	C2
TCGA-55-6981-01A	5.309	C1
TCGA-95-7944-01A	3.02414	C2
TCGA-55-8615-01A	5.64262	C1
TCGA-97-7553-01A	4.55513	C2
TCGA-05-4403-01A	3.11786	C2
TCGA-55-8512-01A	7.06284	C2
TCGA-78-7536-01A	6.6412	C2
TCGA-91-6848-01A	5.47806	C1
TCGA-53-7626-01A	2.05784	C2
TCGA-93-7347-01A	1.78962	C2
TCGA-05-4427-01A	4.8526	C1
TCGA-44-2657-01A	5.75866	C2
TCGA-55-7728-01A	3.42397	C2
TCGA-50-5049-01A	1.59227	C2
TCGA-86-A4P7-01A	3.70052	C2
TCGA-78-7162-01A	4.69389	C2
TCGA-69-8255-01A	NA	C2
TCGA-05-4432-01A	5.29235	C2
TCGA-55-A492-01A	5.26851	C2
TCGA-05-4244-01A	2.96994	C2
TCGA-50-6597-01A	1.90106	C2
TCGA-MP-A5C7-01A	7.35884	C2
TCGA-50-6590-01A	5.15886	C2
TCGA-78-7160-01A	3.73827	C2
TCGA-55-8514-01A	4.94786	C2
TCGA-49-AAR2-01A	6.77741	C2
TCGA-35-4122-01A	3.66291	C2
TCGA-93-A4JO-01A	3.71849	C2
TCGA-55-8096-01A	3.80024	C1
TCGA-55-A48X-01A	4.34391	C2
TCGA-91-6836-01A	5.83315	C2
TCGA-78-7540-01A	5.11135	C2
TCGA-49-4488-01A	4.72766	C2
TCGA-78-7148-01A	4.65261	C2
TCGA-55-7283-01A	2.99311	C2
TCGA-44-3917-01A	4.53008	C1
TCGA-L9-A7SV-01A	3.0299	C2
TCGA-55-8208-01A	2.59477	C2
TCGA-MN-A4N4-01A	3.74301	C1
TCGA-55-6712-01A	4.3366	C2
TCGA-97-8172-01A	4.52543	C2
TCGA-44-2661-01A	3.56888	C2
TCGA-55-A491-01A	3.87661	C2
TCGA-MP-A4SY-01A	4.62901	C1
TCGA-05-4395-01A	4.101	C2
TCGA-44-7667-01A	6.60774	C1
TCGA-44-A47G-01A	3.7183	C2
TCGA-05-4389-01A	0.476146	C2
TCGA-95-7562-01A	7.08549	C2
TCGA-86-7714-01A	3.04224	C2
TCGA-86-8076-01A	3.8027	C2
TCGA-50-5068-01A	-1.83019	C2
TCGA-97-7937-01A	4.70346	C1
TCGA-05-4398-01A	5.53808	C2
TCGA-50-6592-01A	3.24206	C1
TCGA-44-3396-01A	4.99129	C1

## Sheet: Gefitinib
	est.ic50	ImmClust
TCGA-97-7938-01A	2.11697	C2
TCGA-55-7574-01A	2.23347	C1
TCGA-05-4250-01A	2.15815	C2
TCGA-95-A4VK-01A	2.03703	C2
TCGA-97-A4M6-01A	2.14228	C2
TCGA-78-7155-01A	2.38331	C2
TCGA-05-4402-01A	2.10938	C2
TCGA-MP-A4T4-01A	2.06984	C2
TCGA-78-7535-01A	1.72187	C2
TCGA-55-8619-01A	2.14941	C2
TCGA-95-7567-01A	2.14525	C2
TCGA-49-6745-01A	2.18687	C1
TCGA-MP-A4TI-01A	2.20612	C1
TCGA-50-6673-01A	2.12619	C1
TCGA-55-1592-01A	2.25446	C2
TCGA-44-8117-01A	2.10575	C1
TCGA-50-6594-01A	2.25722	C1
TCGA-62-8402-01A	2.20719	C2
TCGA-50-5045-01A	2.24963	C2
TCGA-J2-A4AD-01A	2.06058	C1
TCGA-4B-A93V-01A	2.15435	C2
TCGA-67-3770-01A	2.27448	C2
TCGA-05-5715-01A	2.15916	C1
TCGA-50-8460-01A	2.21291	C2
TCGA-05-4249-01A	2.1818	C2
TCGA-86-A4P8-01A	2.38601	C2
TCGA-55-A494-01A	2.133	C1
TCGA-95-8494-01A	2.07767	C2
TCGA-55-7726-01A	2.08679	C1
TCGA-78-8660-01A	2.21092	C2
TCGA-49-4490-01A	2.06923	C2
TCGA-05-4410-01A	1.93117	C2
TCGA-44-2659-01A	2.2061	C2
TCGA-78-7633-01A	2.49063	C2
TCGA-55-8299-01A	2.24409	C1
TCGA-67-6217-01A	2.14135	C2
TCGA-67-3774-01A	2.39459	C2
TCGA-MP-A4T6-01A	1.96832	C2
TCGA-50-5942-01A	2.14811	C2
TCGA-86-8280-01A	2.33285	C2
TCGA-44-7662-01A	2.22974	C1
TCGA-78-7146-01A	2.22404	C1
TCGA-97-8179-01A	2.29874	C2
TCGA-55-7570-01A	2.4117	C1
TCGA-50-5072-01A	2.22963	C1
TCGA-49-AAQV-01A	2.04892	C2
TCGA-86-8671-01A	2.19533	C2
TCGA-91-6829-01A	2.49005	C1
TCGA-78-7537-01A	2.42859	C1
TCGA-91-8497-01A	2.18797	C2
TCGA-69-7973-01A	2.32039	C1
TCGA-NJ-A55A-01A	2.0498	C2
TCGA-91-6849-01A	2.1834	C2
TCGA-49-AAR9-01A	2.05979	C1
TCGA-97-7552-01A	1.8552	C2
TCGA-55-8092-01A	2.03306	C2
TCGA-75-6214-01A	1.46407	C2
TCGA-49-6744-01A	2.20466	C2
TCGA-64-1680-01A	2.13502	C2
TCGA-95-7043-01A	2.24019	C1
TCGA-55-8091-01A	2.2199	C1
TCGA-73-4676-01A	2.23397	C1
TCGA-55-6982-01A	2.20205	C1
TCGA-62-A46Y-01A	2.07469	C2
TCGA-44-2656-01A	2.09727	C2
TCGA-L4-A4E5-01A	2.02349	C1
TCGA-50-5051-01A	2.23631	C2
TCGA-49-AARQ-01A	1.98245	C2
TCGA-78-7161-01A	2.77223	C1
TCGA-05-4426-01A	2.19936	C2
TCGA-97-A4M0-01A	2.00684	C2
TCGA-44-8120-01A	2.37086	C1
TCGA-78-7147-01A	2.1003	C2
TCGA-86-7713-01A	2.36023	C1
TCGA-67-3773-01A	2.10355	C2
TCGA-44-A479-01A	2.14169	C1
TCGA-05-4422-01A	2.09306	C2
TCGA-49-4494-01A	2.10071	C2
TCGA-91-6830-01A	2.19653	C2
TCGA-44-7669-01A	2.37376	C2
TCGA-50-5066-01A	2.2365	C2
TCGA-64-5815-01A	2.33478	C1
TCGA-50-5939-01A	2.04804	C1
TCGA-MP-A4TA-01A	1.99044	C2
TCGA-64-5778-01A	2.06124	C2
TCGA-80-5611-01A	2.14235	C2
TCGA-44-2662-01A	2.25771	C1
TCGA-05-5429-01A	1.86633	C2
TCGA-38-4632-01A	2.31085	C2
TCGA-O1-A52J-01A	2.30368	C2
TCGA-75-6206-01A	2.38827	C2
TCGA-64-5774-01A	2.02578	C1
TCGA-05-4418-01A	2.07993	C2
TCGA-64-1677-01A	2.12225	C2
TCGA-55-8507-01A	2.20625	C1
TCGA-05-5425-01A	2.22458	C2
TCGA-49-4510-01A	2.73894	C2
TCGA-78-8655-01A	2.16072	C1
TCGA-55-6979-01A	1.96089	C2
TCGA-NJ-A7XG-01A	2.05432	C2
TCGA-91-8499-01A	2.20202	C2
TCGA-50-7109-01A	2.36772	C1
TCGA-97-8547-01A	2.33265	C1
TCGA-49-4514-01A	1.94302	C2
TCGA-78-7153-01A	2.24979	C2
TCGA-55-6971-01A	2.14843	C2
TCGA-49-AARE-01A	1.96352	C1
TCGA-69-8254-01A	1.84193	C2
TCGA-49-6761-01A	2.21905	C1
TCGA-69-7980-01A	2.23967	C2
TCGA-69-8253-01A	2.07555	C2
TCGA-95-7947-01A	1.91281	C2
TCGA-95-8039-01A	2.16492	C2
TCGA-62-8394-01A	1.98351	C2
TCGA-55-8616-01A	1.81078	C1
TCGA-55-6986-01A	2.32425	C2
TCGA-49-6743-01A	2.19699	C1
TCGA-49-AAR4-01A	1.82016	C1
TCGA-35-3615-01A	2.3395	C2
TCGA-99-AA5R-01A	2.25215	C2
TCGA-05-4417-01A	2.32697	C1
TCGA-53-7624-01A	1.97244	C2
TCGA-97-A4M2-01A	2.23085	C2
TCGA-97-A4M3-01A	2.44644	C1
TCGA-44-2668-01A	2.1273	C1
TCGA-49-AAR0-01A	2.29938	C2
TCGA-78-7158-01A	2.27136	C2
TCGA-49-4512-01A	2.14886	C1
TCGA-86-7711-01A	2.17757	C1
TCGA-75-5147-01A	2.24019	C2
TCGA-L9-A50W-01A	1.92377	C2
TCGA-75-5125-01A	2.29436	C2
TCGA-80-5607-01A	2.07311	C2
TCGA-55-8094-01A	2.33941	C2
TCGA-05-4430-01A	2.35435	C1
TCGA-91-A4BD-01A	2.11682	C2
TCGA-78-7149-01A	2.44863	C2
TCGA-50-6593-01A	2.12501	C1
TCGA-86-8054-01A	2.42406	C1
TCGA-55-A48Z-01A	2.0015	C1
TCGA-05-5420-01A	2.14339	C2
TCGA-55-8090-01A	2.09814	C1
TCGA-44-8119-01A	2.26276	C1
TCGA-55-7994-01A	2.11308	C2
TCGA-69-7763-01A	2.23242	C1
TCGA-73-7499-01A	2.0832	C2
TCGA-55-8301-01A	2.12822	C2
TCGA-NJ-A4YI-01A	2.16868	C1
TCGA-55-7573-01A	2.08563	C2
TCGA-75-7030-01A	2.17461	C1
TCGA-91-A4BC-01A	2.11036	C1
TCGA-78-7220-01A	2.15254	C2
TCGA-05-4382-01A	2.20105	C1
TCGA-75-7031-01A	2.0568	C2
TCGA-86-8278-01A	2.19977	C1
TCGA-NJ-A55R-01A	2.276	C1
TCGA-97-8175-01A	2.08101	C2
TCGA-73-4662-01A	2.18028	C2
TCGA-44-6774-01A	2.57966	C1
TCGA-MP-A4TJ-01A	2.07187	C1
TCGA-69-7765-01A	2.23095	C1
TCGA-64-5775-01A	2.82806	C1
TCGA-44-7661-01A	2.2597	C1
TCGA-49-4486-01A	2.04181	C2
TCGA-75-6211-01A	2.28197	C1
TCGA-49-AARN-01A	2.06238	C2
TCGA-38-7271-01A	2.17862	C2
TCGA-62-8399-01A	2.20036	C1
TCGA-73-4666-01A	2.10561	C2
TCGA-86-7953-01A	2.35145	C1
TCGA-75-5126-01A	2.21436	C2
TCGA-86-8055-01A	2.3925	C1
TCGA-55-5899-01A	2.39751	C1
TCGA-86-8359-01A	1.74968	C1
TCGA-05-4420-01A	2.33204	C2
TCGA-38-4625-01A	2.42086	C1
TCGA-55-8505-01A	2.1698	C1
TCGA-99-8028-01A	2.05041	C2
TCGA-38-6178-01A	2.18053	C1
TCGA-55-6987-01A	2.13182	C2
TCGA-83-5908-01A	2.01615	C2
TCGA-55-6543-01A	2.15897	C2
TCGA-64-1678-01A	2.17877	C2
TCGA-91-6835-01A	2.20857	C2
TCGA-S2-AA1A-01A	2.09109	C2
TCGA-69-7761-01A	1.89208	C2
TCGA-86-8672-01A	2.09429	C2
TCGA-44-5644-01A	2.17269	C1
TCGA-MP-A4SW-01A	1.96826	C2
TCGA-MP-A4SV-01A	2.1477	C2
TCGA-44-6779-01A	1.86256	C2
TCGA-97-A4LX-01A	2.22326	C2
TCGA-99-8025-01A	2.05136	C1
TCGA-55-A57B-01A	2.13298	C1
TCGA-MN-A4N1-01A	2.01346	C1
TCGA-38-4628-01A	2.28364	C2
TCGA-35-4123-01A	2.1298	C2
TCGA-50-5930-01A	2.01847	C1
TCGA-73-4677-01A	2.24248	C2
TCGA-69-7764-01A	2.27369	C2
TCGA-49-4501-01A	2.27402	C2
TCGA-44-3918-01A	2.14355	C2
TCGA-44-2655-01A	2.2172	C2
TCGA-05-4434-01A	2.0222	C2
TCGA-44-6145-01A	1.94333	C2
TCGA-78-7150-01A	2.19266	C1
TCGA-38-4626-01A	2.44793	C2
TCGA-91-6840-01A	2.07702	C2
TCGA-J2-A4AE-01A	1.92722	C2
TCGA-50-5932-01A	2.19192	C2
TCGA-62-A46R-01A	1.99496	C2
TCGA-05-4405-01A	2.20161	C1
TCGA-75-6212-01A	2.20037	C2
TCGA-97-7554-01A	2.19583	C1
TCGA-73-4675-01A	2.17487	C1
TCGA-MN-A4N5-01A	2.02528	C2
TCGA-91-6828-01A	2.28213	C2
TCGA-93-8067-01A	2.16297	C1
TCGA-97-8176-01A	2.27723	C1
TCGA-55-A493-01A	2.12115	C1
TCGA-62-A46S-01A	2.41791	C2
TCGA-55-6968-01A	2.12376	C2
TCGA-44-6147-01A	2.07476	C2
TCGA-55-7911-01A	2.13653	C2
TCGA-73-4658-01A	2.24762	C1
TCGA-44-6778-01A	2.228	C2
TCGA-75-6205-01A	2.19706	C1
TCGA-75-6203-01A	2.35128	C2
TCGA-L9-A444-01A	2.01534	C2
TCGA-64-5779-01A	2.16647	C1
TCGA-44-7660-01A	1.97074	C1
TCGA-44-2666-01A	2.13796	C2
TCGA-78-8640-01A	2.18999	C2
TCGA-44-6777-01A	2.37377	C1
TCGA-J2-8194-01A	2.47022	C1
TCGA-55-7903-01A	2.17279	C2
TCGA-97-8174-01A	3.05988	C1
TCGA-99-8033-01A	1.97345	C2
TCGA-55-1594-01A	2.39375	C2
TCGA-55-6980-01A	2.15175	C2
TCGA-MP-A4TK-01A	2.25986	C1
TCGA-55-8207-01A	2.28066	C1
TCGA-44-A4SS-01A	2.18849	C1
TCGA-50-5933-01A	2.37077	C1
TCGA-44-7672-01A	2.15245	C1
TCGA-67-3771-01A	2.03782	C2
TCGA-67-3772-01A	2.12269	C2
TCGA-97-A4M5-01A	2.20937	C2
TCGA-53-A4EZ-01A	2.15625	C2
TCGA-99-8032-01A	2.28569	C1
TCGA-73-4670-01A	2.1402	C1
TCGA-55-7576-01A	2.13693	C1
TCGA-05-4425-01A	2.16657	C2
TCGA-93-A4JN-01A	2.12995	C1
TCGA-55-6983-01A	2.2371	C1
TCGA-75-7027-01A	2.34599	C1
TCGA-62-A472-01A	2.05109	C2
TCGA-78-7154-01A	2.14153	C1
TCGA-50-5044-01A	2.42368	C2
TCGA-95-A4VP-01A	2.21012	C2
TCGA-86-8674-01A	2.25093	C1
TCGA-97-A4M1-01A	2.29082	C2
TCGA-49-AARO-01A	2.06757	C1
TCGA-91-6831-01A	2.24587	C1
TCGA-55-6642-01A	2.27792	C1
TCGA-86-8056-01A	2.2616	C2
TCGA-L9-A5IP-01A	1.84885	C1
TCGA-97-7546-01A	2.16891	C2
TCGA-97-7547-01A	2.18442	C2
TCGA-NJ-A55O-01A	2.22342	C2
TCGA-55-7914-01A	2.09375	C2
TCGA-78-7143-01A	1.97875	C2
TCGA-55-8205-01A	2.19214	C2
TCGA-05-4415-01A	2.39529	C2
TCGA-86-8358-01A	2.24888	C1
TCGA-91-6847-01A	2.08658	C2
TCGA-86-8585-01A	1.89892	C2
TCGA-55-8203-01A	2.13713	C1
TCGA-71-6725-01A	1.90988	C2
TCGA-55-7816-01A	2.27828	C1
TCGA-55-6978-01A	2.3413	C1
TCGA-44-6775-01A	2.22747	C1
TCGA-49-4506-01A	2.23837	C2
TCGA-86-7954-01A	2.35827	C2
TCGA-78-8662-01A	2.17942	C1
TCGA-MP-A4TF-01A	2.14187	C2
TCGA-MP-A4T7-01A	2.17679	C2
TCGA-44-5645-01A	2.16532	C2
TCGA-55-8506-01A	2.00999	C1
TCGA-50-6591-01A	2.58988	C1
TCGA-L4-A4E6-01A	2.40168	C2
TCGA-49-4505-01A	2.06564	C2
TCGA-44-4112-01A	2.30172	C2
TCGA-67-6216-01A	2.05049	C2
TCGA-55-8508-01A	1.99375	C1
TCGA-55-8085-01A	2.24447	C2
TCGA-62-A471-01A	1.93458	C2
TCGA-44-A4SU-01A	2.04758	C1
TCGA-73-7498-01A	2.24153	C2
TCGA-55-8206-01A	2.1663	C2
TCGA-75-6207-01A	2.15606	C1
TCGA-95-7948-01A	2.1702	C2
TCGA-50-5944-01A	2.32267	C2
TCGA-50-8459-01A	2.40852	C1
TCGA-49-6742-01A	2.12642	C2
TCGA-64-1679-01A	2.24061	C1
TCGA-L9-A443-01A	2.13566	C1
TCGA-97-A4M7-01A	2.1062	C2
TCGA-MP-A4TH-01A	2.75695	C2
TCGA-75-5122-01A	2.17587	C2
TCGA-55-8087-01A	2.18515	C2
TCGA-62-A46P-01A	2.71539	C2
TCGA-50-6595-01A	2.23635	C1
TCGA-44-6146-01A	2.13723	C2
TCGA-49-AAR3-01A	2.05575	C2
TCGA-55-6985-01A	1.9859	C1
TCGA-38-4627-01A	2.57355	C1
TCGA-55-6975-01A	2.33568	C1
TCGA-62-A46V-01A	2.27863	C1
TCGA-55-6984-01A	1.85285	C2
TCGA-53-7813-01A	2.26092	C2
TCGA-38-4631-01A	2.33254	C2
TCGA-49-4507-01A	2.01485	C2
TCGA-78-7159-01A	2.3062	C1
TCGA-55-8510-01A	2.09286	C1
TCGA-86-7955-01A	2.18466	C2
TCGA-55-A4DG-01A	1.86962	C2
TCGA-44-6148-01A	2.30325	C2
TCGA-93-A4JP-01A	2.23275	C2
TCGA-50-5931-01A	2.33603	C1
TCGA-97-8177-01A	2.20937	C2
TCGA-50-5946-01A	2.12317	C1
TCGA-50-5055-01A	2.1275	C2
TCGA-78-8648-01A	2.47496	C1
TCGA-71-8520-01A	2.27346	C1
TCGA-50-5935-01A	2.16778	C2
TCGA-78-7167-01A	2.24422	C1
TCGA-69-7978-01A	2.10153	C2
TCGA-44-7670-01A	2.42444	C1
TCGA-69-7974-01A	2.05759	C1
TCGA-44-3398-01A	2.18803	C2
TCGA-NJ-A4YG-01A	2.12526	C2
TCGA-05-5428-01A	2.11508	C2
TCGA-93-A4JQ-01A	2.16816	C1
TCGA-69-7760-01A	2.3099	C1
TCGA-55-A4DF-01A	1.98211	C2
TCGA-62-8397-01A	2.02267	C2
TCGA-78-7163-01A	2.14866	C2
TCGA-86-A456-01A	2.2228	C2
TCGA-91-7771-01A	2.24924	C2
TCGA-50-8457-01A	2.03041	C2
TCGA-80-5608-01A	2.04079	C2
TCGA-86-6851-01A	1.87047	C2
TCGA-05-4384-01A	2.11747	C2
TCGA-64-1681-01A	2.09894	C2
TCGA-44-7671-01A	2.40056	C1
TCGA-55-8511-01A	2.114	C1
TCGA-MP-A4TC-01A	2.1317	C1
TCGA-75-7025-01A	2.08005	C2
TCGA-55-8302-01A	1.97325	C2
TCGA-NJ-A4YF-01A	2.17044	C1
TCGA-55-6970-01A	2.19374	C2
TCGA-55-8620-01A	1.97499	C2
TCGA-50-5941-01A	2.08174	C2
TCGA-78-7539-01A	2.23574	C2
TCGA-L9-A743-01A	2.12232	C2
TCGA-73-A9RS-01A	2.25438	C2
TCGA-44-2665-01A	2.44683	C1
TCGA-L9-A8F4-01A	2.18326	C2
TCGA-55-7725-01A	2.08455	C2
TCGA-MP-A4TE-01A	2.18849	C1
TCGA-86-8673-01A	2.17841	C1
TCGA-86-8074-01A	2.20763	C1
TCGA-86-A4D0-01A	2.22337	C1
TCGA-MP-A4T8-01A	2.18775	C1
TCGA-44-5643-01A	1.76872	C2
TCGA-97-8552-01A	2.35853	C2
TCGA-69-A59K-01A	2.38507	C1
TCGA-86-7701-01A	2.18763	C1
TCGA-62-A470-01A	2.34766	C2
TCGA-55-7727-01A	2.07233	C2
TCGA-62-8398-01A	2.21476	C1
TCGA-78-7145-01A	2.35021	C1
TCGA-67-6215-01A	2.13617	C2
TCGA-55-7907-01A	1.93299	C1
TCGA-MP-A4T9-01A	2.24774	C1
TCGA-86-8669-01A	2.68795	C2
TCGA-49-AARR-01A	2.01982	C2
TCGA-97-7941-01A	2.05684	C2
TCGA-44-A47B-01A	2.20685	C2
TCGA-55-7227-01A	2.10212	C2
TCGA-55-8097-01A	2.16447	C2
TCGA-97-8171-01A	2.32982	C2
TCGA-99-7458-01A	2.13788	C2
TCGA-55-8089-01A	1.94386	C2
TCGA-05-4424-01A	2.39958	C2
TCGA-62-8395-01A	2.57881	C1
TCGA-55-A490-01A	2.19549	C1
TCGA-64-1676-01A	2.03001	C2
TCGA-50-5936-01A	2.30623	C1
TCGA-55-A48Y-01A	2.23	C1
TCGA-93-7348-01A	2.1622	C1
TCGA-38-4630-01A	2.40858	C1
TCGA-05-5423-01A	2.19545	C2
TCGA-55-8621-01A	2.30736	C2
TCGA-05-4397-01A	2.39183	C2
TCGA-55-7910-01A	2.11134	C1
TCGA-J2-A4AG-01A	2.08807	C2
TCGA-86-8073-01A	2.0905	C1
TCGA-75-5146-01A	2.4637	C2
TCGA-NJ-A4YQ-01A	2.02378	C2
TCGA-55-7995-01A	2.0817	C2
TCGA-44-7659-01A	2.13487	C2
TCGA-55-1596-01A	2.18948	C2
TCGA-69-7979-01A	2.13225	C1
TCGA-55-7724-01A	1.80424	C2
TCGA-55-6972-01A	2.58381	C2
TCGA-44-3919-01A	2.1261	C2
TCGA-J2-8192-01A	2.2221	C1
TCGA-44-A47A-01A	2.22437	C2
TCGA-38-4629-01A	2.23631	C2
TCGA-86-A4JF-01A	2.0641	C2
TCGA-69-8453-01A	2.08696	C2
TCGA-91-8496-01A	2.43722	C2
TCGA-95-7039-01A	2.01265	C1
TCGA-NJ-A4YP-01A	2.20934	C1
TCGA-62-A46O-01A	2.07027	C2
TCGA-73-4668-01A	2.20873	C1
TCGA-05-4433-01A	2.15582	C2
TCGA-95-A4VN-01A	2.15918	C2
TCGA-78-7156-01A	2.20124	C2
TCGA-38-A44F-01A	1.90398	C2
TCGA-05-4396-01A	2.18488	C2
TCGA-55-8204-01A	1.60968	C1
TCGA-55-7815-01A	2.17756	C1
TCGA-55-7281-01A	2.02873	C1
TCGA-78-7166-01A	1.89258	C2
TCGA-55-8614-01A	1.9233	C1
TCGA-78-7152-01A	2.11641	C2
TCGA-64-5781-01A	1.99918	C2
TCGA-86-8075-01A	2.30533	C1
TCGA-MP-A4TD-01A	2.30187	C1
TCGA-86-8281-01A	2.25938	C1
TCGA-55-8513-01A	2.05553	C2
TCGA-78-7542-01A	2.01045	C2
TCGA-49-4487-01A	2.18321	C1
TCGA-05-4390-01A	2.03308	C1
TCGA-86-8668-01A	2.25348	C2
TCGA-73-4659-01A	2.29156	C1
TCGA-35-5375-01A	2.05323	C2
TCGA-86-6562-01A	2.06072	C1
TCGA-86-8279-01A	2.24598	C1
TCGA-49-6767-01A	2.11764	C2
TCGA-44-6776-01A	2.13048	C2
TCGA-55-6981-01A	2.12428	C1
TCGA-95-7944-01A	2.02747	C2
TCGA-55-8615-01A	2.25424	C1
TCGA-97-7553-01A	2.30738	C2
TCGA-05-4403-01A	1.94749	C2
TCGA-55-8512-01A	2.42066	C2
TCGA-78-7536-01A	1.89596	C2
TCGA-91-6848-01A	2.64335	C1
TCGA-53-7626-01A	2.0566	C2
TCGA-93-7347-01A	2.13171	C2
TCGA-05-4427-01A	2.31159	C1
TCGA-44-2657-01A	2.14982	C2
TCGA-55-7728-01A	1.87255	C2
TCGA-50-5049-01A	2.06125	C2
TCGA-86-A4P7-01A	2.23593	C2
TCGA-78-7162-01A	2.41572	C2
TCGA-69-8255-01A	2.48961	C2
TCGA-05-4432-01A	2.31657	C2
TCGA-55-A492-01A	2.2986	C2
TCGA-05-4244-01A	2.11631	C2
TCGA-50-6597-01A	1.94648	C2
TCGA-MP-A5C7-01A	2.92549	C2
TCGA-50-6590-01A	2.12026	C2
TCGA-78-7160-01A	2.2136	C2
TCGA-55-8514-01A	1.98132	C2
TCGA-49-AAR2-01A	2.33608	C2
TCGA-35-4122-01A	2.14422	C2
TCGA-93-A4JO-01A	2.09738	C2
TCGA-55-8096-01A	2.18803	C1
TCGA-55-A48X-01A	2.07257	C2
TCGA-91-6836-01A	2.37129	C2
TCGA-78-7540-01A	1.83459	C2
TCGA-49-4488-01A	2.16429	C2
TCGA-78-7148-01A	2.11469	C2
TCGA-55-7283-01A	2.22846	C2
TCGA-44-3917-01A	2.10098	C1
TCGA-L9-A7SV-01A	2.12678	C2
TCGA-55-8208-01A	2.13758	C2
TCGA-MN-A4N4-01A	1.98017	C1
TCGA-55-6712-01A	1.98546	C2
TCGA-97-8172-01A	2.20584	C2
TCGA-44-2661-01A	2.23607	C2
TCGA-55-A491-01A	2.1386	C2
TCGA-MP-A4SY-01A	2.26862	C1
TCGA-05-4395-01A	1.98733	C2
TCGA-44-7667-01A	2.4438	C1
TCGA-44-A47G-01A	1.8705	C2
TCGA-05-4389-01A	2.30714	C2
TCGA-95-7562-01A	1.98508	C2
TCGA-86-7714-01A	2.01148	C2
TCGA-86-8076-01A	1.88086	C2
TCGA-50-5068-01A	2.08072	C2
TCGA-97-7937-01A	1.93395	C1
TCGA-05-4398-01A	2.10057	C2
TCGA-50-6592-01A	2.09144	C1
TCGA-44-3396-01A	2.17497	C1

## Sheet: EASIER
	easier_score	Cluster	CD274	PDCD1
TCGA-97-7938-01A	0.0181804	C2	16.8612	1.0638
TCGA-55-7574-01A	1.07005	C1	8.90811	9.45421
TCGA-05-4250-01A	0.47156	C2	47.7643	15.5539
TCGA-95-A4VK-01A	0.142112	C2	5.61118	4.00177
TCGA-97-A4M6-01A	0.627562	C2	14.4516	6.62183
TCGA-78-7155-01A	-0.659629	C2	4.21696	1.25149
TCGA-05-4402-01A	0.162095	C2	6.28267	1.25249
TCGA-MP-A4T4-01A	0.994374	C2	73.1261	11.1175
TCGA-78-7535-01A	-0.36233	C2	2.79787	0.749668
TCGA-55-8619-01A	0.668036	C2	9.70877	8.35514
TCGA-95-7567-01A	0.275092	C2	11.3303	3.9176
TCGA-49-6745-01A	0.542994	C1	105.33	4.77955
TCGA-MP-A4TI-01A	1.20857	C1	67.3231	13.6499
TCGA-50-6673-01A	-0.200217	C1	3.60137	0.942642
TCGA-55-1592-01A	-0.0435501	C2	8.34833	0.811124
TCGA-44-8117-01A	-0.22866	C1	13.3394	2.85933
TCGA-50-6594-01A	-0.249179	C1	230.504	12.3514
TCGA-62-8402-01A	0.782391	C2	27.5388	5.27048
TCGA-50-5045-01A	1.08209	C2	22.4324	7.48861
TCGA-J2-A4AD-01A	-0.705198	C1	5.05778	0.809965
TCGA-4B-A93V-01A	-0.310459	C2	42.0115	3.67601
TCGA-67-3770-01A	0.172345	C2	4.90433	1.74139
TCGA-05-5715-01A	-0.245781	C1	3.79146	0.598651
TCGA-50-8460-01A	0.278012	C2	6.02967	4.33243
TCGA-05-4249-01A	0.222501	C2	8.03728	3.0251
TCGA-86-A4P8-01A	1.01212	C2	17.2231	4.95487
TCGA-55-A494-01A	-0.861775	C1	1.31807	17.1147
TCGA-95-8494-01A	-0.262094	C2	21.9211	1.94986
TCGA-55-7726-01A	-0.164819	C1	6.00919	0.586262
TCGA-78-8660-01A	0.578852	C2	19.1018	12.0018
TCGA-49-4490-01A	-0.362599	C2	2.33177	2.11653
TCGA-05-4410-01A	0.824374	C2	14.1264	3.79927
TCGA-44-2659-01A	0.438046	C2	7.66883	3.7031
TCGA-78-7633-01A	-0.633509	C2	2.21642	0.316631
TCGA-55-8299-01A	0.99897	C1	26.86	7.37624
TCGA-67-6217-01A	0.527713	C2	6.8828	3.95761
TCGA-67-3774-01A	0.290904	C2	6.81095	3.09362
TCGA-MP-A4T6-01A	0.0318574	C2	6.36379	3.73937
TCGA-50-5942-01A	0.0460999	C2	4.35031	1.11938
TCGA-86-8280-01A	0.566363	C2	12.5969	6.81133
TCGA-44-7662-01A	0.287632	C1	18.9541	3.64802
TCGA-78-7146-01A	-0.155791	C1	17.4345	7.42144
TCGA-97-8179-01A	-0.384241	C2	6.15034	0.973954
TCGA-55-7570-01A	-0.460554	C1	3.79679	2.43794
TCGA-50-5072-01A	-0.389932	C1	6.4176	1.61921
TCGA-49-AAQV-01A	0.0771879	C2	13.2947	4.91643
TCGA-86-8671-01A	1.64371	C2	20.0532	20.5997
TCGA-91-6829-01A	-0.258423	C1	10.5995	0.994457
TCGA-78-7537-01A	-0.293071	C1	2.11247	1.47602
TCGA-91-8497-01A	0.575674	C2	8.09986	5.33265
TCGA-69-7973-01A	-0.290521	C1	4.43025	1.98294
TCGA-NJ-A55A-01A	0.564257	C2	12.4753	5.77088
TCGA-91-6849-01A	0.20464	C2	4.0094	1.90738
TCGA-49-AAR9-01A	-0.494232	C1	3.32826	1.50909
TCGA-97-7552-01A	1.45925	C2	14.6031	5.61948
TCGA-55-8092-01A	0.831113	C2	10.6013	6.36075
TCGA-75-6214-01A	-0.544178	C2	12.8973	0.922173
TCGA-49-6744-01A	0.735112	C2	10.2744	6.17792
TCGA-64-1680-01A	-0.411893	C2	3.73357	0.883516
TCGA-95-7043-01A	-0.725606	C1	1.09779	0.5832
TCGA-55-8091-01A	0.310781	C1	34.4227	2.43298
TCGA-73-4676-01A	-0.280079	C1	22.7164	1.02726
TCGA-55-6982-01A	0.207506	C1	10.113	3.31349
TCGA-62-A46Y-01A	0.447465	C2	30.2646	3.06372
TCGA-44-2656-01A	1.04987	C2	58.4005	5.1385
TCGA-L4-A4E5-01A	-0.0709028	C1	17.9963	3.03308
TCGA-50-5051-01A	-0.548425	C2	3.84309	1.61351
TCGA-49-AARQ-01A	0.122016	C2	4.75744	5.8742
TCGA-78-7161-01A	-0.587886	C1	1.90362	0.533589
TCGA-05-4426-01A	-0.140113	C2	32.3126	2.47786
TCGA-97-A4M0-01A	0.506759	C2	11.8373	5.66218
TCGA-44-8120-01A	-0.220052	C1	6.00104	1.85585
TCGA-78-7147-01A	-0.0486963	C2	4.5541	2.93137
TCGA-86-7713-01A	-0.674862	C1	3.99199	0.776558
TCGA-67-3773-01A	0.460381	C2	13.1635	2.6656
TCGA-44-A479-01A	1.04282	C1	17.4056	13.0302
TCGA-05-4422-01A	0.546174	C2	7.14092	7.94221
TCGA-49-4494-01A	0.0495618	C2	9.89117	2.29999
TCGA-91-6830-01A	0.283353	C2	12.2894	2.59094
TCGA-44-7669-01A	0.12302	C2	10.9463	3.36921
TCGA-50-5066-01A	1.01766	C2	11.0768	4.13452
TCGA-64-5815-01A	0.0769952	C1	10.3749	1.48665
TCGA-50-5939-01A	0.287928	C1	15.5483	3.45179
TCGA-MP-A4TA-01A	0.204399	C2	7.90896	5.63845
TCGA-64-5778-01A	1.00026	C2	27.1867	12.1281
TCGA-80-5611-01A	0.356489	C2	10.0551	4.40588
TCGA-44-2662-01A	0.0845287	C1	46.3473	1.79792
TCGA-05-5429-01A	-0.423067	C2	1.20801	0.508637
TCGA-38-4632-01A	0.428633	C2	20.3415	12.7341
TCGA-O1-A52J-01A	0.0767386	C2	6.7875	2.50932
TCGA-75-6206-01A	-0.250382	C2	3.63855	0.917033
TCGA-64-5774-01A	-0.427313	C1	5.01483	2.01035
TCGA-05-4418-01A	0.452808	C2	13.6094	4.71381
TCGA-64-1677-01A	0.298672	C2	14.2466	3.01214
TCGA-55-8507-01A	-0.278526	C1	4.84519	1.51567
TCGA-05-5425-01A	0.741815	C2	13.0784	5.75254
TCGA-49-4510-01A	-0.370592	C2	3.91982	0.894988
TCGA-78-8655-01A	0.155809	C1	8.51581	3.53826
TCGA-55-6979-01A	1.11411	C2	54.6961	17.4641
TCGA-NJ-A7XG-01A	-0.673836	C2	3.10845	0.460511
TCGA-91-8499-01A	-0.240682	C2	6.3751	3.70167
TCGA-50-7109-01A	0.189298	C1	4.95208	4.34432
TCGA-97-8547-01A	-0.258882	C1	11.6253	1.1209
TCGA-49-4514-01A	-0.078522	C2	2.02567	4.32508
TCGA-78-7153-01A	-0.439773	C2	0.942662	1.20573
TCGA-55-6971-01A	1.14152	C2	15.3458	12.9393
TCGA-49-AARE-01A	-0.19752	C1	3.55425	3.16715
TCGA-69-8254-01A	0.273619	C2	9.81367	3.31963
TCGA-49-6761-01A	0.492013	C1	43.5397	8.92281
TCGA-69-7980-01A	0.316631	C2	17.2501	6.79507
TCGA-69-8253-01A	-0.483185	C2	3.07708	1.27366
TCGA-95-7947-01A	0.209113	C2	10.9972	3.50127
TCGA-95-8039-01A	0.355946	C2	14.2142	2.61667
TCGA-62-8394-01A	0.0601688	C2	6.08386	2.72589
TCGA-55-8616-01A	-0.295474	C1	13.4668	2.47397
TCGA-55-6986-01A	-0.159627	C2	7.76446	1.50379
TCGA-49-6743-01A	0.142608	C1	16.6163	2.15262
TCGA-49-AAR4-01A	0.978933	C1	24.6272	18.1478
TCGA-35-3615-01A	-0.257599	C2	3.60973	1.52247
TCGA-99-AA5R-01A	0.975072	C2	21.6281	8.55171
TCGA-05-4417-01A	0.574335	C1	9.76554	5.35881
TCGA-53-7624-01A	-0.00902701	C2	22.853	3.35647
TCGA-97-A4M2-01A	0.602804	C2	17.6572	4.32951
TCGA-97-A4M3-01A	-0.495335	C1	3.3569	1.03608
TCGA-44-2668-01A	0.874793	C1	32.9306	6.097
TCGA-49-AAR0-01A	0.114251	C2	6.49151	8.13494
TCGA-78-7158-01A	-0.536208	C2	4.78858	0.520108
TCGA-49-4512-01A	-0.276436	C1	4.51681	0.797084
TCGA-86-7711-01A	0.0340081	C1	7.83677	2.58665
TCGA-75-5147-01A	0.424674	C2	7.63397	3.01589
TCGA-L9-A50W-01A	-0.101089	C2	2.52083	4.16777
TCGA-75-5125-01A	0.682557	C2	140.718	11.6976
TCGA-80-5607-01A	0.364562	C2	9.15157	4.1856
TCGA-55-8094-01A	-0.774648	C2	2.00478	3.24369
TCGA-05-4430-01A	0.292857	C1	10.0211	2.11404
TCGA-91-A4BD-01A	0.0163672	C2	4.97394	1.22774
TCGA-78-7149-01A	-0.620686	C2	1.02966	0.576611
TCGA-50-6593-01A	-0.154735	C1	16.982	0.995596
TCGA-86-8054-01A	-0.765646	C1	3.83191	0.729887
TCGA-55-A48Z-01A	0.124887	C1	22.0508	3.86712
TCGA-05-5420-01A	1.28775	C2	20.9929	4.50533
TCGA-55-8090-01A	-0.0565138	C1	32.4918	1.45394
TCGA-44-8119-01A	0.106835	C1	7.42668	2.98128
TCGA-55-7994-01A	0.956066	C2	91.0189	8.06628
TCGA-69-7763-01A	-0.0662425	C1	6.34208	0.7868
TCGA-73-7499-01A	0.812394	C2	11.2717	9.74116
TCGA-55-8301-01A	1.07441	C2	44.4638	9.63323
TCGA-NJ-A4YI-01A	-0.301607	C1	29.0114	2.97322
TCGA-55-7573-01A	0.560892	C2	6.77033	1.97223
TCGA-75-7030-01A	0.270398	C1	8.2343	3.03569
TCGA-91-A4BC-01A	1.24095	C1	8.14045	19.4707
TCGA-78-7220-01A	-0.386338	C2	5.70575	2.11243
TCGA-05-4382-01A	0.362667	C1	15.8511	3.91688
TCGA-75-7031-01A	0.154408	C2	6.16933	5.59809
TCGA-86-8278-01A	0.0075813	C1	11.4431	1.56602
TCGA-NJ-A55R-01A	-0.419661	C1	3.93599	1.95839
TCGA-97-8175-01A	0.151456	C2	25.3031	1.55734
TCGA-73-4662-01A	0.538288	C2	18.7567	3.93302
TCGA-44-6774-01A	0.055999	C1	7.18479	3.25561
TCGA-MP-A4TJ-01A	1.45122	C1	40.1594	11.9774
TCGA-69-7765-01A	0.376988	C1	9.49882	2.11361
TCGA-64-5775-01A	-0.383404	C1	74.9116	0.33424
TCGA-44-7661-01A	0.528677	C1	112.514	3.72518
TCGA-49-4486-01A	-0.717778	C2	1.66262	0.626328
TCGA-75-6211-01A	-0.233335	C1	2.71072	1.6942
TCGA-49-AARN-01A	0.151054	C2	12.9411	1.98292
TCGA-38-7271-01A	1.46279	C2	11.9899	14.4258
TCGA-62-8399-01A	-0.220624	C1	10.7966	1.6241
TCGA-73-4666-01A	0.822936	C2	75.875	10.7298
TCGA-86-7953-01A	0.295963	C1	5.65941	6.3209
TCGA-75-5126-01A	0.908375	C2	129.937	2.67479
TCGA-86-8055-01A	0.100789	C1	10.4542	1.77793
TCGA-55-5899-01A	-0.0277541	C1	8.32537	3.39587
TCGA-86-8359-01A	0.39975	C1	4.84107	12.2804
TCGA-05-4420-01A	-0.418653	C2	1.91008	0.960499
TCGA-38-4625-01A	0.403473	C1	116.934	2.00745
TCGA-55-8505-01A	-0.597779	C1	2.16842	0.593733
TCGA-99-8028-01A	1.37879	C2	46.5204	11.843
TCGA-38-6178-01A	-0.108599	C1	4.47643	4.82077
TCGA-55-6987-01A	1.33889	C2	32.183	8.4255
TCGA-83-5908-01A	1.22036	C2	161.516	11.2987
TCGA-55-6543-01A	0.0534428	C2	14.9685	0.892162
TCGA-64-1678-01A	-0.786522	C2	0.972427	0.412545
TCGA-91-6835-01A	1.23855	C2	21.4189	8.86374
TCGA-S2-AA1A-01A	0.737489	C2	7.45433	4.88387
TCGA-69-7761-01A	1.10138	C2	13.6778	6.2172
TCGA-86-8672-01A	0.415002	C2	17.2835	14.3509
TCGA-44-5644-01A	-0.671153	C1	1.7494	1.20648
TCGA-MP-A4SW-01A	0.283749	C2	8.85056	3.3908
TCGA-MP-A4SV-01A	0.636447	C2	21.9726	11.129
TCGA-44-6779-01A	0.774841	C2	19.2644	6.53155
TCGA-97-A4LX-01A	1.17367	C2	37.0229	21.0241
TCGA-99-8025-01A	-0.322123	C1	6.27952	1.29112
TCGA-55-A57B-01A	0.0373395	C1	9.82526	1.87764
TCGA-MN-A4N1-01A	-0.835681	C1	5.76685	0.591472
TCGA-38-4628-01A	-0.413982	C2	3.5914	0.374105
TCGA-35-4123-01A	1.39995	C2	64.6951	19.3938
TCGA-50-5930-01A	0.165063	C1	3.57231	3.67294
TCGA-73-4677-01A	-0.138291	C2	4.85879	1.89015
TCGA-69-7764-01A	-0.0911235	C2	4.22466	1.89968
TCGA-49-4501-01A	0.208663	C2	7.99794	2.16011
TCGA-44-3918-01A	1.0442	C2	94.5028	7.42938
TCGA-44-2655-01A	0.030192	C2	4.08377	1.58572
TCGA-05-4434-01A	0.672193	C2	33.6623	5.62204
TCGA-44-6145-01A	0.851334	C2	27.6908	12.7847
TCGA-78-7150-01A	-0.495379	C1	3.15367	1.67208
TCGA-38-4626-01A	0.386164	C2	17.8903	1.67378
TCGA-91-6840-01A	0.164811	C2	4.8718	3.84974
TCGA-J2-A4AE-01A	0.351409	C2	13.3593	2.67677
TCGA-50-5932-01A	-0.550826	C2	3.35838	0.403739
TCGA-62-A46R-01A	0.240004	C2	12.1991	1.88202
TCGA-05-4405-01A	0.135624	C1	11.9489	1.71144
TCGA-75-6212-01A	0.277111	C2	6.90734	2.93409
TCGA-97-7554-01A	0.1928	C1	53.0389	2.30604
TCGA-73-4675-01A	-0.500358	C1	1.39153	1.02852
TCGA-MN-A4N5-01A	0.332851	C2	41.7886	11.2722
TCGA-91-6828-01A	0.52276	C2	12.4298	6.0969
TCGA-93-8067-01A	-0.372293	C1	4.03148	1.62445
TCGA-97-8176-01A	-0.413786	C1	2.09378	1.35168
TCGA-55-A493-01A	0.769729	C1	64.2036	27.1295
TCGA-62-A46S-01A	-0.169838	C2	6.16021	1.10137
TCGA-55-6968-01A	0.402553	C2	20.1125	5.75824
TCGA-44-6147-01A	0.354152	C2	4.0679	4.08026
TCGA-55-7911-01A	0.843605	C2	37.7524	11.9665
TCGA-73-4658-01A	0.424098	C1	51.3338	4.29029
TCGA-44-6778-01A	1.15228	C2	37.2983	8.35897
TCGA-75-6205-01A	1.07223	C1	30.4298	5.56159
TCGA-75-6203-01A	0.457635	C2	10.7957	1.69882
TCGA-L9-A444-01A	1.26333	C2	45.9551	19.2481
TCGA-64-5779-01A	0.1927	C1	4.52271	4.01353
TCGA-44-7660-01A	-0.427963	C1	11.1057	3.32134
TCGA-44-2666-01A	-0.243294	C2	16.054	0.972683
TCGA-78-8640-01A	-0.20846	C2	5.31935	4.10571
TCGA-44-6777-01A	0.644771	C1	19.2674	2.88696
TCGA-J2-8194-01A	-0.0638491	C1	5.51183	1.83728
TCGA-55-7903-01A	0.233606	C2	36.4576	3.37686
TCGA-97-8174-01A	0.169424	C1	5.19998	3.55442
TCGA-99-8033-01A	0.410873	C2	19.6039	9.14069
TCGA-55-1594-01A	-0.116268	C2	9.21047	2.70569
TCGA-55-6980-01A	0.366037	C2	12.814	2.97736
TCGA-MP-A4TK-01A	0.290028	C1	7.39284	5.03039
TCGA-55-8207-01A	0.139394	C1	7.27162	1.44565
TCGA-44-A4SS-01A	0.552924	C1	12.5786	10.6565
TCGA-50-5933-01A	0.184396	C1	66.1468	20.3324
TCGA-44-7672-01A	0.960144	C1	17.3677	8.3525
TCGA-67-3771-01A	0.254332	C2	8.21899	4.18314
TCGA-67-3772-01A	0.0874816	C2	2.39428	1.01297
TCGA-97-A4M5-01A	0.140856	C2	10.6258	2.35325
TCGA-53-A4EZ-01A	-0.323759	C2	6.23697	3.02293
TCGA-99-8032-01A	-0.194913	C1	4.34899	1.89219
TCGA-73-4670-01A	-0.304199	C1	4.15522	0.583369
TCGA-55-7576-01A	0.138789	C1	9.36559	2.9764
TCGA-05-4425-01A	0.54735	C2	16.2871	2.6312
TCGA-93-A4JN-01A	0.358908	C1	9.45405	7.39798
TCGA-55-6983-01A	0.375856	C1	5.22174	4.58837
TCGA-75-7027-01A	-0.436652	C1	3.20179	1.69792
TCGA-62-A472-01A	0.241408	C2	30.4379	5.88258
TCGA-78-7154-01A	-0.426177	C1	3.74587	1.51189
TCGA-50-5044-01A	0.0766264	C2	42.4902	4.76686
TCGA-95-A4VP-01A	0.145026	C2	7.78198	4.08605
TCGA-86-8674-01A	-0.779342	C1	3.30007	1.38552
TCGA-97-A4M1-01A	0.0539017	C2	10.1187	0.957739
TCGA-49-AARO-01A	0.545584	C1	21.5528	5.08745
TCGA-91-6831-01A	0.00171664	C1	8.86347	1.55185
TCGA-55-6642-01A	0.472968	C1	6.87403	1.975
TCGA-86-8056-01A	0.128741	C2	8.49624	1.96375
TCGA-L9-A5IP-01A	-0.150764	C1	11.652	1.83883
TCGA-97-7546-01A	0.693835	C2	21.0145	2.97217
TCGA-97-7547-01A	-0.171663	C2	7.40828	2.202
TCGA-NJ-A55O-01A	-0.159253	C2	15.2904	1.35967
TCGA-55-7914-01A	0.252944	C2	14.4501	2.23159
TCGA-78-7143-01A	0.0483077	C2	11.0591	2.31086
TCGA-55-8205-01A	1.14393	C2	89.7038	7.74301
TCGA-05-4415-01A	-0.188838	C2	7.29171	2.22632
TCGA-86-8358-01A	-0.170884	C1	6.31814	2.44034
TCGA-91-6847-01A	-0.690031	C2	5.91912	1.89736
TCGA-86-8585-01A	0.296868	C2	13.5489	7.7548
TCGA-55-8203-01A	0.442528	C1	9.00686	4.37815
TCGA-71-6725-01A	-0.455838	C2	3.02333	0.0525797
TCGA-55-7816-01A	0.587345	C1	15.1159	4.14848
TCGA-55-6978-01A	1.18741	C1	87.8357	11.7666
TCGA-44-6775-01A	0.203187	C1	11.9906	1.97731
TCGA-49-4506-01A	0.103831	C2	3.29041	4.01094
TCGA-86-7954-01A	0.665636	C2	16.9398	4.69632
TCGA-78-8662-01A	-0.831683	C1	2.15812	0.629451
TCGA-MP-A4TF-01A	-0.181921	C2	36.0448	1.81338
TCGA-MP-A4T7-01A	-0.153856	C2	5.41382	1.90417
TCGA-44-5645-01A	0.437511	C2	8.32649	3.55327
TCGA-55-8506-01A	-0.0368905	C1	10.9777	3.39543
TCGA-50-6591-01A	-1.13103	C1	0.934309	0.109919
TCGA-L4-A4E6-01A	0.614837	C2	13.1624	2.45844
TCGA-49-4505-01A	0.582125	C2	17.3619	5.5576
TCGA-44-4112-01A	-0.0555489	C2	8.72889	1.08466
TCGA-67-6216-01A	0.212005	C2	13.334	2.92519
TCGA-55-8508-01A	-0.0600283	C1	4.12101	2.49255
TCGA-55-8085-01A	0.589919	C2	6.85568	6.20067
TCGA-62-A471-01A	-0.484412	C2	4.64934	2.21604
TCGA-44-A4SU-01A	0.0155475	C1	8.26513	4.83432
TCGA-73-7498-01A	-0.111943	C2	3.2031	3.05583
TCGA-55-8206-01A	0.247672	C2	8.16641	1.55162
TCGA-75-6207-01A	-0.413161	C1	68.7357	0.589702
TCGA-95-7948-01A	-0.433698	C2	1.43278	0.85967
TCGA-50-5944-01A	-0.273273	C2	4.36701	0.418396
TCGA-50-8459-01A	0.381862	C1	4.35047	5.57859
TCGA-49-6742-01A	-0.463531	C2	3.42905	0.904022
TCGA-64-1679-01A	-0.0836638	C1	9.50799	0.66872
TCGA-L9-A443-01A	-0.0856654	C1	9.00164	2.14673
TCGA-97-A4M7-01A	0.495845	C2	14.5782	4.60929
TCGA-MP-A4TH-01A	0.789479	C2	8.23655	7.17314
TCGA-75-5122-01A	2.22239	C2	56.6269	22.2687
TCGA-55-8087-01A	-0.496116	C2	2.58585	1.23325
TCGA-62-A46P-01A	-0.450796	C2	2.25081	0.739993
TCGA-50-6595-01A	0.376151	C1	67.6794	2.67496
TCGA-44-6146-01A	-0.389339	C2	3.04424	0.413416
TCGA-49-AAR3-01A	1.11051	C2	64.0521	12.4175
TCGA-55-6985-01A	0.57214	C1	17.1218	5.50121
TCGA-38-4627-01A	0.100968	C1	5.44662	1.56243
TCGA-55-6975-01A	-0.234658	C1	2.40958	1.07505
TCGA-62-A46V-01A	-0.46657	C1	5.03347	0.485686
TCGA-55-6984-01A	-0.288601	C2	4.24111	1.66503
TCGA-53-7813-01A	0.0291652	C2	5.34928	1.01519
TCGA-38-4631-01A	-0.131648	C2	2.42339	1.3571
TCGA-49-4507-01A	0.523893	C2	4.69795	13.9774
TCGA-78-7159-01A	0.106718	C1	4.69303	1.62952
TCGA-55-8510-01A	0.567001	C1	22.9009	7.93622
TCGA-86-7955-01A	-0.902135	C2	2.24313	1.04494
TCGA-55-A4DG-01A	0.212693	C2	6.43262	2.87465
TCGA-44-6148-01A	0.0209094	C2	6.24611	1.16207
TCGA-93-A4JP-01A	0.161612	C2	14.6004	0.764609
TCGA-50-5931-01A	-0.789689	C1	1.60045	0.407388
TCGA-97-8177-01A	0.361941	C2	5.52121	2.77441
TCGA-50-5946-01A	-0.441356	C1	3.93099	0.964481
TCGA-50-5055-01A	1.55383	C2	6.23661	11.5923
TCGA-78-8648-01A	0.816785	C1	10.9352	8.37893
TCGA-71-8520-01A	-0.115656	C1	10.0613	1.01482
TCGA-50-5935-01A	0.148621	C2	6.9389	1.78511
TCGA-78-7167-01A	-0.59883	C1	0.83656	0.565908
TCGA-69-7978-01A	1.05075	C2	71.4436	16.6727
TCGA-44-7670-01A	-0.179113	C1	8.03837	4.68423
TCGA-69-7974-01A	0.49664	C1	47.8658	4.4428
TCGA-44-3398-01A	0.454587	C2	25.7157	1.39554
TCGA-NJ-A4YG-01A	0.0520505	C2	8.97494	1.36986
TCGA-05-5428-01A	-0.268377	C2	6.61678	0.548857
TCGA-93-A4JQ-01A	0.905161	C1	25.6924	10.9898
TCGA-69-7760-01A	-0.691358	C1	3.67073	0.161605
TCGA-55-A4DF-01A	0.591751	C2	33.8077	5.13808
TCGA-62-8397-01A	-0.276988	C2	3.71338	0.813891
TCGA-78-7163-01A	-0.390077	C2	11.8738	0.815635
TCGA-86-A456-01A	0.433023	C2	26.5331	3.07554
TCGA-91-7771-01A	0.566475	C2	8.30431	5.36221
TCGA-50-8457-01A	0.704836	C2	5.44414	4.26304
TCGA-80-5608-01A	-0.239458	C2	5.59466	2.25221
TCGA-86-6851-01A	1.28927	C2	19.2839	13.0946
TCGA-05-4384-01A	-0.103444	C2	5.00796	1.28776
TCGA-64-1681-01A	0.160319	C2	5.59793	1.8088
TCGA-44-7671-01A	-0.649115	C1	2.12998	0.452621
TCGA-55-8511-01A	0.510942	C1	49.1858	5.13179
TCGA-MP-A4TC-01A	0.375418	C1	55.3376	6.26997
TCGA-75-7025-01A	0.362678	C2	6.3268	1.73252
TCGA-55-8302-01A	0.191567	C2	80.674	3.41183
TCGA-NJ-A4YF-01A	-0.704468	C1	1.5385	1.78665
TCGA-55-6970-01A	0.307622	C2	13.8869	3.78074
TCGA-55-8620-01A	0.112009	C2	7.59676	4.18488
TCGA-50-5941-01A	0.989756	C2	29.2854	9.79903
TCGA-78-7539-01A	0.582524	C2	11.65	7.17867
TCGA-L9-A743-01A	0.995191	C2	19.2023	11.025
TCGA-73-A9RS-01A	-0.428989	C2	13.9952	1.98125
TCGA-44-2665-01A	0.0393451	C1	20.3394	1.65858
TCGA-L9-A8F4-01A	0.586915	C2	9.26463	10.304
TCGA-55-7725-01A	0.483634	C2	15.847	0.408429
TCGA-MP-A4TE-01A	-0.818574	C1	2.06796	0.39561
TCGA-86-8673-01A	-0.105045	C1	2.80925	3.68383
TCGA-86-8074-01A	0.287993	C1	11.1062	2.88902
TCGA-86-A4D0-01A	-0.46487	C1	5.50095	1.5168
TCGA-MP-A4T8-01A	-0.539521	C1	2.99613	1.24044
TCGA-44-5643-01A	0.059623	C2	4.25716	4.04562
TCGA-97-8552-01A	0.181344	C2	6.95622	2.41955
TCGA-69-A59K-01A	0.24528	C1	100.562	3.85919
TCGA-86-7701-01A	0.841238	C1	9.77238	6.88509
TCGA-62-A470-01A	-0.542513	C2	6.17294	0.263801
TCGA-55-7727-01A	0.552093	C2	13.2635	0.591366
TCGA-62-8398-01A	-0.068494	C1	11.4063	2.99458
TCGA-78-7145-01A	-0.319634	C1	10.8768	1.6624
TCGA-67-6215-01A	-0.396474	C2	4.06841	0.659742
TCGA-55-7907-01A	0.24334	C1	9.39623	4.78292
TCGA-MP-A4T9-01A	0.198362	C1	23.6316	11.1621
TCGA-86-8669-01A	0.0687776	C2	6.75885	4.30877
TCGA-49-AARR-01A	0.315323	C2	14.3207	5.30993
TCGA-97-7941-01A	0.00263667	C2	4.36969	2.01565
TCGA-44-A47B-01A	0.259582	C2	4.0119	4.69024
TCGA-55-7227-01A	0.515562	C2	25.2995	4.49941
TCGA-55-8097-01A	-0.00407429	C2	3.97028	2.51676
TCGA-97-8171-01A	-0.792935	C2	0.945807	0.136743
TCGA-99-7458-01A	0.780164	C2	39.2309	3.78362
TCGA-55-8089-01A	1.33413	C2	31.3142	11.2657
TCGA-05-4424-01A	0.042901	C2	6.19174	2.22268
TCGA-62-8395-01A	-0.208536	C1	1.92682	1.60568
TCGA-55-A490-01A	-0.407274	C1	2.78527	1.12242
TCGA-64-1676-01A	0.335787	C2	40.9746	1.35813
TCGA-50-5936-01A	-0.154293	C1	4.84168	2.57758
TCGA-55-A48Y-01A	-0.127832	C1	4.08933	0.97883
TCGA-93-7348-01A	0.027627	C1	5.69741	1.67424
TCGA-38-4630-01A	-0.297178	C1	4.0924	1.54625
TCGA-05-5423-01A	0.597352	C2	7.22034	2.10834
TCGA-55-8621-01A	0.639743	C2	27.6543	4.50958
TCGA-05-4397-01A	0.122705	C2	5.05001	1.54251
TCGA-55-7910-01A	-0.244834	C1	4.37558	1.45853
TCGA-J2-A4AG-01A	0.585719	C2	12.081	3.02025
TCGA-86-8073-01A	-0.204919	C1	4.33468	1.14925
TCGA-75-5146-01A	0.179128	C2	2.95808	2.17328
TCGA-NJ-A4YQ-01A	0.946817	C2	13.125	11.9034
TCGA-55-7995-01A	0.777996	C2	20.2353	18.197
TCGA-44-7659-01A	0.149097	C2	9.17035	1.24455
TCGA-55-1596-01A	-0.102801	C2	4.65994	1.63366
TCGA-69-7979-01A	-0.566882	C1	7.68964	1.84274
TCGA-55-7724-01A	0.587191	C2	12.3175	0.54651
TCGA-55-6972-01A	-0.825854	C2	1.00004	0.208341
TCGA-44-3919-01A	0.690454	C2	22.3907	4.95395
TCGA-J2-8192-01A	0.222754	C1	14.7598	1.36169
TCGA-44-A47A-01A	0.421168	C2	11.8032	4.65736
TCGA-38-4629-01A	0.579145	C2	32.7262	6.2563
TCGA-86-A4JF-01A	0.231901	C2	34.0877	3.10755
TCGA-69-8453-01A	0.573359	C2	10.9461	5.14167
TCGA-91-8496-01A	0.129646	C2	10.3574	0.86794
TCGA-95-7039-01A	-0.147197	C1	15.898	2.79458
TCGA-NJ-A4YP-01A	-0.0122886	C1	6.48153	1.38757
TCGA-62-A46O-01A	-0.768741	C2	3.57543	0.151074
TCGA-73-4668-01A	-0.465309	C1	5.7772	1.73937
TCGA-05-4433-01A	0.25352	C2	7.33006	2.1559
TCGA-95-A4VN-01A	0.799008	C2	177.817	8.00054
TCGA-78-7156-01A	-0.374507	C2	2.0331	0.279551
TCGA-38-A44F-01A	0.870878	C2	10.1513	4.06053
TCGA-05-4396-01A	-0.298881	C2	2.93351	1.10438
TCGA-55-8204-01A	0.0560564	C1	13.2775	1.75363
TCGA-55-7815-01A	0.359841	C1	12.2393	0.586817
TCGA-55-7281-01A	0.339415	C1	5.03653	2.34308
TCGA-78-7166-01A	-0.443065	C2	2.54399	1.51496
TCGA-55-8614-01A	-0.235054	C1	6.53461	2.18732
TCGA-78-7152-01A	0.171652	C2	3.52922	3.28583
TCGA-64-5781-01A	0.456609	C2	10.9351	6.42138
TCGA-86-8075-01A	0.215889	C1	14.6292	1.71179
TCGA-MP-A4TD-01A	-0.0862008	C1	3.10103	2.95727
TCGA-86-8281-01A	-0.276417	C1	2.03053	1.05402
TCGA-55-8513-01A	0.443029	C2	15.0789	2.31983
TCGA-78-7542-01A	0.0600288	C2	77.306	1.71291
TCGA-49-4487-01A	0.831667	C1	9.48826	6.78235
TCGA-05-4390-01A	-0.518244	C1	5.697	1.15675
TCGA-86-8668-01A	0.267885	C2	7.78485	4.21952
TCGA-73-4659-01A	-0.183364	C1	6.93612	1.0741
TCGA-35-5375-01A	0.00251804	C2	12.0696	3.58066
TCGA-86-6562-01A	-0.093204	C1	10.4589	0.79467
TCGA-86-8279-01A	-0.501166	C1	2.55321	0.756508
TCGA-49-6767-01A	0.36607	C2	33.1913	3.23818
TCGA-44-6776-01A	-0.620005	C2	2.96244	0.755725
TCGA-55-6981-01A	-0.130561	C1	10.3764	2.19872
TCGA-95-7944-01A	1.02173	C2	23.9053	24.1729
TCGA-55-8615-01A	-0.692382	C1	1.43432	0.624623
TCGA-97-7553-01A	1.03614	C2	21.1362	4.67222
TCGA-05-4403-01A	0.155379	C2	5.81943	0.829918
TCGA-55-8512-01A	-0.293759	C2	6.22801	0.551558
TCGA-78-7536-01A	-0.119576	C2	4.95457	3.75008
TCGA-91-6848-01A	0.578844	C1	61.6012	3.59047
TCGA-53-7626-01A	0.981151	C2	11.0527	5.67006
TCGA-93-7347-01A	0.988153	C2	8.39205	7.35742
TCGA-05-4427-01A	0.196371	C1	43.4195	1.19709
TCGA-44-2657-01A	1.31243	C2	8.45709	16.7824
TCGA-55-7728-01A	0.675514	C2	12.5122	4.25528
TCGA-50-5049-01A	1.44227	C2	15.3808	11.7756
TCGA-86-A4P7-01A	0.643549	C2	9.48101	5.67168
TCGA-78-7162-01A	0.222765	C2	5.71859	2.28433
TCGA-69-8255-01A	0.70541	C2	8.42036	16.6905
TCGA-05-4432-01A	0.164211	C2	8.20694	4.24236
TCGA-55-A492-01A	-0.571429	C2	1.49281	0.81607
TCGA-05-4244-01A	0.00295452	C2	29.7263	1.01019
TCGA-50-6597-01A	0.239032	C2	5.53296	11.1355
TCGA-MP-A5C7-01A	-0.638584	C2	1.95562	0.30964
TCGA-50-6590-01A	0.745826	C2	63.0511	7.99849
TCGA-78-7160-01A	0.530547	C2	12.1426	5.1057
TCGA-55-8514-01A	-0.023095	C2	8.05109	1.93117
TCGA-49-AAR2-01A	-0.151352	C2	2.13962	3.90166
TCGA-35-4122-01A	0.925073	C2	24.2493	3.8425
TCGA-93-A4JO-01A	0.736566	C2	14.9529	9.19141
TCGA-55-8096-01A	-0.049416	C1	5.02716	6.53908
TCGA-55-A48X-01A	0.7698	C2	11.2712	7.98659
TCGA-91-6836-01A	-0.122596	C2	28.8732	1.41683
TCGA-78-7540-01A	-0.328875	C2	5.14514	0.317438
TCGA-49-4488-01A	0.162742	C2	14.4284	2.82651
TCGA-78-7148-01A	-0.118154	C2	3.61435	2.131
TCGA-55-7283-01A	0.0928734	C2	6.31829	2.19206
TCGA-44-3917-01A	0.223907	C1	6.75964	1.93948
TCGA-L9-A7SV-01A	-0.510282	C2	3.40674	1.79659
TCGA-55-8208-01A	1.20104	C2	38.0437	8.90812
TCGA-MN-A4N4-01A	-0.38655	C1	5.77724	1.54197
TCGA-55-6712-01A	0.785495	C2	26.9391	6.4232
TCGA-97-8172-01A	0.640806	C2	6.08883	6.52629
TCGA-44-2661-01A	1.12082	C2	12.2027	4.84176
TCGA-55-A491-01A	-0.0112832	C2	14.7894	8.37342
TCGA-MP-A4SY-01A	-0.404892	C1	24.6478	1.12643
TCGA-05-4395-01A	0.0482698	C2	6.68631	1.98305
TCGA-44-7667-01A	-0.606982	C1	3.42775	0.739011
TCGA-44-A47G-01A	0.988874	C2	30.2462	9.76652
TCGA-05-4389-01A	0.589044	C2	13.8713	6.23904
TCGA-95-7562-01A	-0.0876482	C2	7.02462	3.41113
TCGA-86-7714-01A	-0.149956	C2	4.77923	0.955846
TCGA-86-8076-01A	0.733424	C2	8.63497	6.51111
TCGA-50-5068-01A	0.849067	C2	6.35791	2.35478
TCGA-97-7937-01A	-0.468875	C1	2.89217	0.408097
TCGA-05-4398-01A	0.477688	C2	73.1563	5.85176
TCGA-50-6592-01A	0.622462	C1	12.1434	5.95787
TCGA-44-3396-01A	0.88379	C1	34.7561	6.33533
