# Supplementary material for: An integrated bioinformatic analysis of bulk and single-cell sequencing clarifies immune microenvironment and metabolic profiles of lung adenocarcinoma to predict immunotherapy efficacy
Source: Front Cell Dev Biol. 2023 Apr 5;11:1163314. doi: 10.3389/fcell.2023.1163314 (PMC10113470; doi:10.3389/fcell.2023.1163314)
Supplement: Supplementary file 2 [file Table3.XLSX]

## Sheet: Sheet1
Sex	Age	T	N	M	Stage
Female	65
Female	66			M1	IIIb
Female	78
Male	68			M1
Female	49	T4	Nx	M1	IV
Male	66	T0	N1	M1	IVc
Male	64			M1
Male	64	Tx	N0	M1b	IV
Female	46			M1
Female	65	T2a	N0	M0	Ib
Female	59	T2a	N2	M1
Male	66		N0		I
Male	66	T2a	N0	M0	Ib
Female	58	T1a	N0	M0	II
Female	65		N0
Female	62		N0
Female	53	T1a	N0	M0	I
Female	52	T1b	N0	M0	IA-IIA
Female	49	T1b	N0	M0	II
Female	43	T1a	N0	M0	IA
Female	61		N0
Female	63		N0
Female	57	T1	N0	M0	IA
Female	59	T2b	N1	M0	IIB
Female	45	T1b	N0	M1	IIIA
Female	67	T1b	N0	M0	II
Male	71	T1	N2	M0
Female	36	T1a	N0	M0	I
Female	55		N0
Female	63	T1c	N0	M0	III
Male	57
Female	55	T1c	N0	M0	IA3
Male	44		N0	M0
Female	56	T1b	N0	M0	II
Male	56	T2	N1	M0	IIIA
Male	55	T1b	N0	M0
Female	61	T1a	N0	M0	IA
Female	35	T1	N1	M0
Female	43				I
Male	48				I
Male	36	T1b	N2	M1	IIIA
Male	55		N0
