# Supplementary material for: An integrated bioinformatic analysis of bulk and single-cell sequencing clarifies immune microenvironment and metabolic profiles of lung adenocarcinoma to predict immunotherapy efficacy
Source: Front Cell Dev Biol. 2023 Apr 5;11:1163314. doi: 10.3389/fcell.2023.1163314 (PMC10113470; doi:10.3389/fcell.2023.1163314)
Supplement: Supplementary file 5 [file Table1.XLSX]

## Sheet: Sheet1
Gene	Gene signature
ANGPT1	Angiogenesis
ANGPT2	Angiogenesis
CDH5	Angiogenesis
CXCL5	Angiogenesis
CXCL8	Angiogenesis
CXCR2	Angiogenesis
FLT1	Angiogenesis
KDR	Angiogenesis
PDGFC	Angiogenesis
PGF	Angiogenesis
TEK	Angiogenesis
VEGFA	Angiogenesis
VEGFB	Angiogenesis
VEGFC	Angiogenesis
VWF	Angiogenesis
CCL3	Antitumor cytokines
IFNA2	Antitumor cytokines
IFNB1	Antitumor cytokines
IL21	Antitumor cytokines
TNF	Antitumor cytokines
TNFSF10	Antitumor cytokines
BLK	B cells
CD19	B cells
CD22	B cells
CD79A	B cells
CD79B	B cells
CR2	B cells
FCRL5	B cells
MS4A1	B cells
PAX5	B cells
STAP1	B cells
TNFRSF13B	B cells
TNFRSF13C	B cells
TNFRSF17	B cells
ACTA2	Cancer-associated fibroblasts
CD248	Cancer-associated fibroblasts
COL11A1	Cancer-associated fibroblasts
COL1A1	Cancer-associated fibroblasts
COL1A2	Cancer-associated fibroblasts
COL5A1	Cancer-associated fibroblasts
COL6A1	Cancer-associated fibroblasts
COL6A2	Cancer-associated fibroblasts
COL6A3	Cancer-associated fibroblasts
CXCL12	Cancer-associated fibroblasts
FAP	Cancer-associated fibroblasts
FBLN1	Cancer-associated fibroblasts
FGF2	Cancer-associated fibroblasts
FN1	Cancer-associated fibroblasts
LRP1	Cancer-associated fibroblasts
LUM	Cancer-associated fibroblasts
MFAP5	Cancer-associated fibroblasts
MMP2	Cancer-associated fibroblasts
MMP3	Cancer-associated fibroblasts
PDGFRA	Cancer-associated fibroblasts
PDGFRB	Cancer-associated fibroblasts
BTLA	Checkpoint molecules
CD274	Checkpoint molecules
CTLA4	Checkpoint molecules
HAVCR2	Checkpoint molecules
LAG3	Checkpoint molecules
PDCD1	Checkpoint molecules
PDCD1LG2	Checkpoint molecules
TIGIT	Checkpoint molecules
VSIR	Checkpoint molecules
CD40LG	Co-stimulatory ligands
CD70	Co-stimulatory ligands
CD80	Co-stimulatory ligands
CD83	Co-stimulatory ligands
CD86	Co-stimulatory ligands
ICOSLG	Co-stimulatory ligands
TNFSF4	Co-stimulatory ligands
TNFSF9	Co-stimulatory ligands
CD27	Co-stimulatory receptors
CD28	Co-stimulatory receptors
CD40	Co-stimulatory receptors
ICOS	Co-stimulatory receptors
TNFRSF4	Co-stimulatory receptors
TNFRSF9	Co-stimulatory receptors
CCL3	Effector cell traffic
CCL4	Effector cell traffic
CCL5	Effector cell traffic
CX3CL1	Effector cell traffic
CX3CR1	Effector cell traffic
CXCL10	Effector cell traffic
CXCL11	Effector cell traffic
CXCL9	Effector cell traffic
CXCR3	Effector cell traffic
CD8A	Effector cells
CD8B	Effector cells
EOMES	Effector cells
FASLG	Effector cells
GNLY	Effector cells
GZMA	Effector cells
GZMB	Effector cells
GZMK	Effector cells
IFNG	Effector cells
PRF1	Effector cells
TBX21	Effector cells
ZAP70	Effector cells
CDH5	Endothelium
CLEC14A	Endothelium
ENG	Endothelium
FLT1	Endothelium
KDR	Endothelium
MMRN1	Endothelium
MMRN2	Endothelium
NOS3	Endothelium
VCAM1	Endothelium
VWF	Endothelium
CCL11	Granulocyte traffic
CCR3	Granulocyte traffic
CXCL1	Granulocyte traffic
CXCL2	Granulocyte traffic
CXCL5	Granulocyte traffic
CXCL8	Granulocyte traffic
CXCR1	Granulocyte traffic
CXCR2	Granulocyte traffic
KITLG	Granulocyte traffic
ARG1	Immune Suppression by Myeloid Cells
CYBB	Immune Suppression by Myeloid Cells
IDO1	Immune Suppression by Myeloid Cells
IL10	Immune Suppression by Myeloid Cells
IL4I1	Immune Suppression by Myeloid Cells
IL6	Immune Suppression by Myeloid Cells
PTGS2	Immune Suppression by Myeloid Cells
CMKLR1	M1 signature
IL12A	M1 signature
IL12B	M1 signature
IL1B	M1 signature
IL23A	M1 signature
IRF5	M1 signature
NOS2	M1 signature
SOCS3	M1 signature
TNF	M1 signature
CCL2	Macrophage and DC traffic
CCL7	Macrophage and DC traffic
CCL8	Macrophage and DC traffic
CCR2	Macrophage and DC traffic
CSF1	Macrophage and DC traffic
CSF1R	Macrophage and DC traffic
XCL1	Macrophage and DC traffic
XCR1	Macrophage and DC traffic
COL11A1	Matrix
COL1A1	Matrix
COL1A2	Matrix
COL3A1	Matrix
COL4A1	Matrix
COL5A1	Matrix
ELN	Matrix
FN1	Matrix
LAMA3	Matrix
LAMB3	Matrix
LAMC2	Matrix
LGALS7	Matrix
LGALS9	Matrix
TNC	Matrix
VTN	Matrix
ADAMTS4	Matrix remodeling
ADAMTS5	Matrix remodeling
CA9	Matrix remodeling
LOX	Matrix remodeling
MMP1	Matrix remodeling
MMP11	Matrix remodeling
MMP12	Matrix remodeling
MMP2	Matrix remodeling
MMP3	Matrix remodeling
MMP7	Matrix remodeling
MMP9	Matrix remodeling
PLOD2	Matrix remodeling
B2M	MHCI
HLA-A	MHCI
HLA-B	MHCI
HLA-C	MHCI
NLRC5	MHCI
TAP1	MHCI
TAP2	MHCI
TAPBP	MHCI
CIITA	MHCII
HLA-DMA	MHCII
HLA-DMB	MHCII
HLA-DPA1	MHCII
HLA-DPB1	MHCII
HLA-DQA1	MHCII
HLA-DQB1	MHCII
HLA-DRA	MHCII
HLA-DRB1	MHCII
CCL15	Myeloid cells traffic
CCL26	Myeloid cells traffic
CSF1	Myeloid cells traffic
CSF1R	Myeloid cells traffic
CSF2	Myeloid cells traffic
CSF2RA	Myeloid cells traffic
CSF3	Myeloid cells traffic
CSF3R	Myeloid cells traffic
CXCL12	Myeloid cells traffic
CXCL5	Myeloid cells traffic
CXCL8	Myeloid cells traffic
CXCR2	Myeloid cells traffic
CXCR4	Myeloid cells traffic
IL6	Myeloid cells traffic
IL6R	Myeloid cells traffic
CD177	Neutrophil signature
CTSG	Neutrophil signature
CXCR1	Neutrophil signature
CXCR2	Neutrophil signature
ELANE	Neutrophil signature
FCGR3B	Neutrophil signature
FFAR2	Neutrophil signature
MPO	Neutrophil signature
PGLYRP1	Neutrophil signature
PRTN3	Neutrophil signature
CD160	NK cells
CD226	NK cells
CD244	NK cells
EOMES	NK cells
FGFBP2	NK cells
GNLY	NK cells
GZMB	NK cells
GZMH	NK cells
IFNG	NK cells
KIR2DL4	NK cells
KLRC2	NK cells
KLRF1	NK cells
KLRK1	NK cells
NCR1	NK cells
NCR3	NK cells
NKG7	NK cells
SH2D1B	NK cells
IL10	Protumor cytokines
IL22	Protumor cytokines
IL6	Protumor cytokines
MIF	Protumor cytokines
TGFB1	Protumor cytokines
TGFB2	Protumor cytokines
TGFB3	Protumor cytokines
CD28	T cells
CD3D	T cells
CD3E	T cells
CD3G	T cells
CD5	T cells
ITK	T cells
TBX21	T cells
TRAC	T cells
TRAT1	T cells
TRBC1	T cells
TRBC2	T cells
CD40LG	Th1 signature
IFNG	Th1 signature
IL12RB2	Th1 signature
IL2	Th1 signature
IL21	Th1 signature
STAT4	Th1 signature
TBX21	Th1 signature
CCR4	Th2 signature
IL10	Th2 signature
IL13	Th2 signature
IL4	Th2 signature
IL5	Th2 signature
CCR8	Treg
CTLA4	Treg
FOXP3	Treg
IKZF2	Treg
IKZF4	Treg
IL10	Treg
TNFRSF18	Treg
CCL1	Treg and Th2 traffic
CCL17	Treg and Th2 traffic
CCL22	Treg and Th2 traffic
CCL28	Treg and Th2 traffic
CCR10	Treg and Th2 traffic
CCR4	Treg and Th2 traffic
CCR8	Treg and Th2 traffic
AURKA	Tumor proliferation rate
AURKB	Tumor proliferation rate
BUB1	Tumor proliferation rate
CCNB1	Tumor proliferation rate
CCND1	Tumor proliferation rate
CCNE1	Tumor proliferation rate
CDK2	Tumor proliferation rate
CETN3	Tumor proliferation rate
E2F1	Tumor proliferation rate
ESCO2	Tumor proliferation rate
MCM2	Tumor proliferation rate
MCM6	Tumor proliferation rate
MKI67	Tumor proliferation rate
MYBL2	Tumor proliferation rate
PLK1	Tumor proliferation rate
CD163	Tumor-associated Macrophages
CD68	Tumor-associated Macrophages
CSF1R	Tumor-associated Macrophages
IL10	Tumor-associated Macrophages
IL4I1	Tumor-associated Macrophages
MRC1	Tumor-associated Macrophages
MSR1	Tumor-associated Macrophages
SIGLEC1	Tumor-associated Macrophages
